# Supplementary material for: LncRNA-MM2P Identified as a Modulator of Macrophage M2 Polarization
Source: Oxford University Press journal article supplement (doi:10.1158/2326-6066.cir-18-0145), 2018-11-20
Supplement: 23266066cir180145-sup-198309_2_supp_5148383_pht61y.xlsx [file 23266066cir180145-sup-198309_2_supp_5148383_pht61y.xlsx]

## Sheet: Sheet1
Supplemental tables
Supplemental Tables S1.the neucleotide sequence of lncRNA-MM2P
GTACTGGGAAATGAATCCGGACATCACACCCGTGCTGGGCAACTCAGTCCTGTAGGAAACACCAAATATG
ACTCTGCAGCTGCAGACCAGGCCTCTAGGCAGGCGGACTCTAGGCGTGAACCAGCAGCTGCAGTCCTGTC
CTTTCAGCAAGGAGACACCAGACAGCTGTGGTCCATCCTAAAGAAACCGCCAGGCTCGCCAGCCGGCTTG
AGGCGAGGCCACAGAAGCGGCAAGCTGCCACGGGAACCTCATGAGCAGTTCGTGGGCGAGTTTCTCTCAA
CGTCGAAGTTATCACCAGTTGAGCTCAACAATGCTATGTGAGGTAAACCAATACACGTGTGTCTTTGGTG
AAGAATAGCAAGGCGGAGCAAACCAAACCCATGCTAAGTGCTCATCTCCCGCTGTCTGTGGGGTCAAATT
CATACTCCTGCATCGAGTGTCCTTCCTTGTGACTGCTGTATCTAATCATCCGTTCACCTGTGTGGCTTCA
GAAAAACGTTCCTTCACTTGTTTGCTTTAGCAAGACATCCTTTCACCTGTGTGCCCCTGCAAAACATCAT
TTGATATAACTAACATTCCCAAAACTAGAAGTTTCTACTTCACTCTGTCATCCTACTGAAAAACAGTGTC
GAAGGTAGAGGAGAAGATGGCACGGAACCTGCACAAGGCAAAAGGATGAACAGGACCAGCCAGCTCCATC
CTCGGCACTGCAAGCACAATGCATCTCTGTAGCTCCCACGAAGACTGGAATGCAAGTAGGCTAGAAGTCT
CTTAAACCCCCAGAGAAGCCTTGGGCAGGGATTCGAGCCACCAGACTCCTTGAAGGTTGTGTTCCTAAAC
GAAGGTGACTAGTAGATGTGTCAAGCGTGTATTTATCTCTCATCTCCAGCCCTTACAGCTTGCCCTACAG
TAGGTTTTCAATACGAGTTGGGACTTGCGTTTTATAAATCACGAGCATAGATGGTAAATTCTTTTTCTTC
CGTTGCCGATGCTCATGGGAAGCATGCTGTGTGTTTTGTTAATGTTTCCTCCCCGAAGGCTGAGCGCTTG
GTGAACATCTGTCTGCTCACACCTGTTGGGCTGGTTTACACGGCAGTCTGAAAGGCATACATGCCAGGGT
AATTGCATTTGGAGTTCCTTCCCTTGGAGAAATCTGTCGGAAGGATCCAGGACCAGATATTTCTCCCACT
GACGAGTTCATCATCTTGCCTAAAGAAGAGCCAGTATTTCTGCCTCTCATAAGTTTAATGCATGCTGCAA
CATGAATCGGATGAGCTTGAGAACCAGGAAGCATGAATATTTCATACAGCATGAATTGCCAGACTTAAAA
ATCACCTCACGGGACCGACTCTCCAGCTCAGGTGCAAAGACCAGGGAACAAATACGGTCCTGAAGCCAAA
CCAGGCTCTTCCAGACAGGGCCGACACTCAGGCAAAGGAACAGTGGCCTGGTCTGTGTGCCGCAGACAGA
ACGAAGAGGGCATCAGATCACTTGGAACTGGAGTTAAAGACAGCTGTGAGTCACCATGGAGATGCTGGGA
ATTGAAACTAGGCCTTCTGTGAGAGCAGCAGCTGGCAGAGCCGTCTCTCCACCACAAAGTTTTAAACATA
AATACCCTACCGATTCACAACTGCACCTGTCGTGCAAGTGTGCAGTCCCTTAGTTCGCTGTTTCTACTTC
CCTTTTAAAGAAAAAATAAACAAACTTAACAATGT
