# Supplementary material for: LncRNA-MM2P Identified as a Modulator of Macrophage M2 Polarization
Source: Oxford University Press journal article supplement (doi:10.1158/2326-6066.cir-18-0145), 2018-11-20
Supplement: 23266066cir180145-sup-198309_2_supp_5148384_pht61q.xls [file 23266066cir180145-sup-198309_2_supp_5148384_pht61q.xls]

## Sheet: Sheet1
Supplemental tables
Supplemental Tables S2. List of commonly differentially expressed genes in IL13 induced RAW264.7 cells
Gene name	IL13-24 hours	IL13-48 hours	IL13-72 hours
NR_045703.1	0.0966486	0.249094	1.2207
AK164601	0.106395	0.445979	1.11395
AK006483	0.117711	0.0997674	0.106164
AK141803	0.118969	0.576689	0.994286
AK085665	0.121827	0.115081	0.336695
AK015582	0.121897	0.648585	1.34695
AK171262	0.123902	0.551371	0.449894
AK083381	0.125255	0.59869	1.00126
AK148684	0.126166	0.264372	0.844667
AK050217	0.129577	0.512443	1.60183
NR_040359.1	0.130644	0.167846	0.182517
AK078717	0.130766	0.338544	1.18452
AK133252	0.135763	0.496796	0.962355
AK046234	0.139836	0.582885	0.843008
AK140037	0.144844	0.35615	0.725122
AK150110	0.145443	0.219422	0.338781
AK161958	0.14811	0.463746	0.932818
AK046914	0.149938	0.40369	1.03015
AK033207	0.152804	0.553846	0.986898
AK145915	0.153069	0.219373	0.155853
AK084048	0.156699	0.589013	1.02666
AK162406	0.158449	0.422903	0.57647
AK144264	0.161814	0.157319	0.111784
AK037645	0.161906	0.66772	0.838852
AK084930	0.163726	0.468895	0.32428
AK157298	0.16505	0.217462	0.38076
AK048951	0.165624	0.510383	0.804603
AK087598	0.16699	0.25649	0.788519
AK084599	0.167515	0.193544	0.297223
AK149158	0.168377	0.266068	1.3566
AK086054	0.17042	0.559794	0.404569
AK089602	0.171955	0.231977	0.110167
AK085806	0.172045	0.70754	1.7476
AK043307	0.172178	0.340722	0.638
AK048563	0.174138	0.403244	0.787565
AK153815	0.175306	0.226987	0.350456
AK158055	0.177114	0.590926	0.722394
XR_105120.1	0.178694	0.201512	0.74701
AK078997	0.179592	0.670046	0.177617
AK141704	0.18031	0.352963	0.88268
AK151566	0.181673	0.371754	0.0491127
AK146183	0.182862	0.556501	0.726499
AK007352	0.185854	0.787058	1.27075
AK040298	0.18711	0.37948	2.30582
AK041492	0.187954	0.587532	0.812515
AK162488	0.192354	0.622195	0.360033
NR_040404.1	0.192567	0.792351	0.857528
AK010244	0.192629	0.197664	0.923505
AK040292	0.193588	0.596186	0.777592
AK050863	0.196817	0.655341	0.565657
AK037266	0.19694	0.524106	1.03131
AK039912	0.197784	0.565364	0.924305
AK036977	0.198316	0.630727	0.621175
AK036758	0.198365	0.682909	1.62873
AK005366	0.198528	0.385031	1.18933
AK079023	0.199072	0.372594	0.999737
AK136067	0.199247	0.633145	0.51064
AK139694	0.199507	0.0994248	0.211011
AK013162	0.200068	0.508463	0.739675
AK157389	0.201961	0.522002	0.885494
AK150302	0.202502	0.351261	0.58874
NR_045159.1	0.205464	0.27779	0.673515
AK044136	0.206632	0.335777	0.649215
AK080694	0.206665	0.560991	1.19199
AK163442	0.206724	0.413782	0.476864
AK082097	0.206803	0.842449	1.78177
AK085290	0.208655	0.81762	1.48068
AK080515	0.209263	0.309641	0.665028
XR_140568.1	0.210428	0.754545	1.2393
AK163127	0.211383	0.38008	1.14137
AK079875	0.211407	0.656947	0.615137
AK036173	0.212862	0.429668	0.5473
AK085019	0.213896	0.347593	0.391999
AK041608	0.214649	0.531128	0.898051
AK137408	0.215988	0.377301	0.285487
AK154884	0.218596	0.470848	0.942376
AK045352	0.218704	0.529224	0.839957
AK160312	0.21946	0.221885	0.232798
AK032496	0.223049	0.267719	0.775759
XR_104891.1	0.223487	0.712101	0.938517
AK141828	0.224093	0.420201	0.250109
AK080398	0.224869	0.788232	2.77164
XR_105184.1	0.226081	0.615448	0.88066
AK135340	0.227213	0.716264	0.453303
AK029875	0.227273	0.43929	0.699875
AK037816	0.227435	0.323146	0.86765
AK166307	0.227585	0.522593	0.360066
AK082458	0.227778	0.367083	0.331944
AK136016	0.229505	0.165859	0.289357
AK140183	0.230084	0.605725	0.918715
AK144951	0.230249	0.747618	1.07316
AK079274	0.230673	0.773363	0.967713
AK028992	0.230961	0.680438	1.05749
AK159053	0.231253	0.455117	0.769848
AK034735	0.231652	0.732442	1.06549
AK046870	0.232087	0.855546	0.632964
AK085391	0.232722	1.07334	0.744946
AK140970	0.234608	0.67141	0.895741
AK042585	0.235572	0.614882	1.4323
AK030658	0.235873	0.343807	0.785206
AK166679	0.237174	0.484225	1.19076
AK156367	0.238386	0.64152	1.08168
AK011031	0.238478	0.515242	0.708584
AK138916	0.238938	0.7686	0.280892
AK038015	0.24039	0.683921	0.908777
AK080127	0.240604	0.347253	0.70318
AK167185	0.240625	0.38763	0.866667
AK149548	0.24141	0.806235	0.395147
AK005553	0.241425	0.494393	0.540237
NR_015485.1	0.243329	0.669374	0.614849
AK036720	0.243383	0.591231	1.03895
AK047621	0.244753	0.253325	0.265888
AK037638	0.245382	0.692126	0.887724
AK158919	0.247165	0.44819	0.810937
AK147050	0.247903	0.479337	0.261882
AK160209	0.248069	0.705184	0.999649
AK041035	0.248293	0.659617	0.422835
AK163894	0.249065	0.410555	0.825137
AK003919	0.249085	0.42111	0.950114
AK087896	0.249648	0.462528	0.634913
AK160809	0.251021	0.820959	0.482837
AK033359	0.251804	0.966864	1.3376
AK149423	0.252212	0.351573	1.08191
AK143040	0.252686	0.52409	0.64922
AK052630	0.254097	0.441103	0.614613
AK017366	0.25439	0.205297	0.366741
AK161220	0.255413	0.527752	0.764438
AK085481	0.25542	0.4021	0.711043
AK163380	0.255848	0.541062	1.41281
AK082381	0.25632	0.140274	0.183813
AK138995	0.256337	0.274047	0.0292467
AK006651	0.256588	0.735178	0.673254
AK003189	0.257007	0.504477	0.26538
AK041756	0.257087	0.670695	0.619517
NR_045330.1	0.257758	1.03368	2.31041
AK040438	0.257786	0.507052	2.26423
AK135887	0.257938	0.364043	0.49403
AK034420	0.258451	0.482007	0.78217
AK044715	0.26084	0.85061	0.901084
AK141648	0.260968	0.722938	1.22461
AK165292	0.261316	0.312666	0.706352
AK045981	0.261404	0.502388	1.05144
AK081250	0.261479	0.740195	0.260433
AK089699	0.262169	0.359798	1.12905
AK141060	0.262647	0.725585	0.911577
AK143410	0.262831	0.284483	0.331195
AK045629	0.263108	0.324685	0.639344
AK171910	0.26339	0.370806	0.994114
AK010585	0.264702	0.530217	0.219875
XR_140628.2	0.264899	0.902812	0.257176
AK031426	0.265397	0.913704	1.04813
NR_033198.1	0.266369	0.511338	1.00767
AK036741	0.266667	0.632159	1.19541
NR_030465.1	0.267548	0.619809	0.682807
AK153985	0.267996	0.553922	0.379994
AK030623	0.268184	0.288331	0.33595
AK157501	0.268861	0.821803	1.31541
AK086563	0.269126	0.100474	0.233427
AK080944	0.26915	0.309412	0.183791
AK054536	0.270823	0.882913	1.09376
AK085786	0.271056	0.807829	1.29834
AK044576	0.271119	0.502727	0.749082
AK163529	0.272026	1.07147	0.650386
NR_023846.1	0.272802	0.741519	0.505458
NR_029817.1	0.272877	0.612174	0.766194
AK054358	0.273371	0.342976	0.933853
AK032592	0.273435	0.684723	0.798248
AK031599	0.273556	0.507046	1.04228
AK143372	0.27594	0.426316	0.753383
AK141115	0.276143	0.819412	0.628946
AK076792	0.276157	0.709452	1.29133
AK079054	0.276406	0.545856	0.587298
AK054371	0.278086	0.444648	0.690443
AK034435	0.278401	0.681626	1.29511
AK017935	0.278591	0.48925	0.583194
AK046928	0.278834	0.670751	0.481904
AK158474	0.279364	0.542624	0.610908
AK157071	0.280789	0.361742	0.527509
AK014060	0.282552	0.353456	0.402699
AK161703	0.282993	0.557809	0.843336
AK143333	0.283475	0.7375	0.938983
AK148610	0.283639	0.404858	0.727554
AK162493	0.284031	0.698517	0.834206
AK169826	0.284124	0.463103	0.572289
AK015095	0.284142	0.981491	1.96048
AK042766	0.285066	0.428247	0.959508
AK137176	0.285389	1.10104	1.54523
AK080189	0.28543	0.757624	0.865457
AK020195	0.286063	0.768432	0.50893
AK087254	0.286818	0.679276	1.42463
AK035412	0.286981	0.365283	0.572075
AK008076	0.287133	0.15461	0.276798
AK078096	0.28778	0.128265	0.277752
AK079996	0.288183	0.801012	1.2538
XR_168894.1	0.288195	0.166621	0.456716
AK089804	0.288621	0.271396	0.952936
AK003401	0.289094	0.611866	0.478571
AK156883	0.289169	0.396707	1.44842
AK042353	0.28961	1.14402	0.94223
AK030906	0.290362	0.351861	0.855558
AK158290	0.290556	0.213062	0.31131
AK021318	0.290623	0.895434	1.16397
XR_104618.1	0.291108	0.550459	0.510586
AK014507	0.29135	0.704445	1.06588
AK043749	0.291877	0.676187	1.24253
AK041851	0.292571	0.767587	1.36292
AK169688	0.29287	0.63984	0.948071
AK011926	0.293191	0.189853	0.838985
AK035547	0.294243	1.43156	0.656716
AK038872	0.294352	0.61753	0.787907
AK028917	0.294726	0.458945	0.204272
NR_033534.1	0.295096	1.28786	1.43281
AK020543	0.296634	0.69132	2.17179
AK137766	0.296933	0.60733	0.996011
AK081628	0.297221	0.713653	1.08458
AK034025	0.297634	0.809816	0.520947
AK007425	0.298214	0.734597	0.558877
	0.298924	0.539139	0.765166
AK047673	0.299053	0.809202	1.03958
AK086291	0.299104	0.434475	0.47728
AK157967	0.299552	0.351895	0.881979
AK085423	0.301065	0.396124	0.667166
AK047643	0.301179	0.318632	0.29717
AK045616	0.301449	0.526092	0.752862
AK006971	0.301988	0.953746	0.774465
AK143810	0.302048	0.578498	0.665813
AK135924	0.302176	0.734354	1.09347
AK033243	0.302632	1.26962	1.8518
AK131771	0.303939	0.561488	0.684263
AK041209	0.304312	0.511194	1.78109
AK030998	0.304384	0.893852	1.75021
AK076342	0.304561	0.550587	0.533353
AK053148	0.304571	0.665812	0.712453
AK139518	0.304646	0.782999	0.610876
AK030196	0.305863	0.365839	0.996859
AK136081	0.306427	0.665063	1.48223
AK165865	0.306557	0.397851	0.566168
AK158679	0.306651	0.699877	0.649054
AK084262	0.306751	0.568058	1.41556
AK135511	0.307237	0.316712	0.945399
AK164151	0.307562	0.638488	1.03483
AK079201	0.308177	0.326065	0.646337
NR_036582.1	0.308497	0.635366	1.20209
AK154319	0.308632	0.917752	1.41938
AK019465	0.309536	0.551336	0.809864
AK037895	0.309574	0.97596	0.672712
AK078024	0.309896	0.580208	0.311972
AK003745	0.310324	0.685522	1.14953
AK161931	0.310436	0.832797	1.30196
AK143067	0.31048	0.868849	0.78567
NR_035467.2	0.311037	0.168618	0.274805
AK045251	0.311143	0.59672	0.512301
AK158199	0.311566	0.477777	0.70681
AK042173	0.311609	0.429033	0.707201
AK084634	0.312065	0.540328	1.35217
AK052180	0.312828	1.25376	0.873121
AK018753	0.312935	0.597721	1.69608
AK010043	0.313095	0.616542	0.910728
AK043511	0.31315	1.30558	0.681173
AK087152	0.313223	0.57438	0.808264
AK046578	0.313247	0.42808	1.11185
AK083490	0.313925	0.999298	1.02841
AK141016	0.31431	0.522586	0.526166
AK009586	0.314461	0.633128	1.7166
AK021176	0.314753	0.439564	0.445017
AK079964	0.314823	0.880411	1.15829
AK145363	0.316335	0.461358	1.32169
AK160811	0.316575	0.536254	0.891986
AK003630	0.316896	1.15331	1.32559
AK037388	0.317156	0.691838	0.364161
AK089042	0.317364	0.476046	0.913939
AK015603	0.317798	0.736514	1.17835
AK036645	0.31882	0.598565	1.0527
AK043393	0.319037	0.512917	0.419112
AK144359	0.319515	0.596606	0.496727
AK051759	0.319648	0.393187	1.10467
XR_035244.1	0.320775	0.239639	0.25148
AK030528	0.321007	0.408183	0.898505
AK086912	0.321379	0.461474	0.908658
AK014710	0.321858	0.459316	0.836242
AK013971	0.322177	0.63295	1.3263
AK049151	0.322569	0.509327	0.844121
AK032363	0.322894	0.866221	1.26938
AK018490	0.323085	0.828332	0.806296
AK081387	0.323191	0.334476	0.971917
NR_038141.1	0.323286	0.996563	2.48132
AK029183	0.323539	1.02482	0.6795
NR_040355.1	0.323887	0.339458	0.588602
AK148856	0.324935	0.951514	2.58522
NR_045543.1	0.32494	0.864748	1.02686
AK142763	0.326749	0.439095	1.10412
AK009335	0.327234	0.571058	0.860171
AK171816	0.327459	0.756636	1.03101
AK162672	0.327859	0.29811	1.06167
XR_141578.1	0.328296	0.691296	1.34201
XR_035212.1	0.32864	0.707125	0.466425
AK142700	0.329009	0.472258	0.16998
AK006575	0.329019	0.549776	0.882653
AK005828	0.3293	0.798041	0.665514
AK164638	0.329338	1.22052	1.21141
AK039199	0.33119	0.912265	1.08728
AK045790	0.331268	0.702806	0.694424
AK142423	0.332049	0.702977	0.677408
AK141467	0.332333	0.595498	0.889086
AK141890	0.332529	0.720278	0.943874
AK160451	0.332898	0.801567	0.467363
NR_015479.1	0.332974	1.09633	1.01781
AK014557	0.333105	0.596956	0.907319
NR_028141.1	0.333481	0.712004	1.13202
AK163755	0.333987	0.639749	0.919247
XR_168474.1	0.334236	1.03249	0.88207
NR_031758.1	0.335095	1.10677	1.00846
AK131758	0.335123	0.621166	1.12224
XR_168703.1	0.335582	0.873611	0.891005
AK037518	0.335811	0.779077	1.3175
AK138151	0.336211	0.622167	1.345
NR_073364.1	0.336419	0.580799	1.49193
AK013190	0.336518	0.583299	1.08226
AK154977	0.336567	2.10544	0.537326
AK035981	0.337646	0.465429	0.770732
AK042588	0.337986	0.744518	1.63581
AK014614	0.33807	0.358772	1.20456
AK003421	0.338285	0.984112	1.23079
AK034794	0.339301	0.273223	0.428992
AK085200	0.340249	1.14212	2.53008
AK086409	0.340828	0.42656	0.443581
NR_033638.1	0.34131	0.773706	0.954382
AK089771	0.341362	0.296774	0.45362
AK083843	0.341576	0.413212	0.540848
AK044330	0.341684	0.905198	1.1491
AK142914	0.341841	0.352645	1.60581
XR_142378.1	0.341925	0.554097	0.416972
AK046689	0.34215	0.349261	0.326223
AK030697	0.342889	0.830761	1.45259
AK042670	0.342901	0.98276	0.220757
AK020335	0.343188	1.06377	1.27942
AK142628	0.344095	0.608326	0.846219
AK135232	0.344347	0.611094	0.587754
AK049095	0.344714	0.398133	1.07059
AK013859	0.345361	0.920962	1.55136
AK020181	0.345495	1.00349	1.49556
AK050576	0.346579	0.676274	0.669578
NR_027797.1	0.346772	1.1508	0.605001
AK149193	0.346819	0.639206	1.13167
XR_105173.1	0.348515	0.350022	1.58854
AK042259	0.34871	0.577419	0.466774
AK164314	0.349015	0.416714	0.164372
AK161773	0.350059	0.623202	1.34228
AK145235	0.350065	0.366508	0.277369
AK048451	0.350133	0.685866	1.12012
AK157714	0.35043	0.94677	1.05877
AK155063	0.350613	0.755166	1.57303
AK081828	0.35078	0.52378	0.856064
AK015116	0.35154	0.728485	1.23992
AK007597	0.351661	1.35516	1.82436
AK156178	0.35216	0.817281	0.862381
XR_106294.1	0.352581	0.717097	0.984194
AK164711	0.352642	0.671603	1.90793
AK037660	0.354274	0.779783	1.36744
XR_142267.1	0.354341	1.94727	1.01318
AK048943	0.354888	1.01712	0.631038
AK084195	0.354893	0.966169	1.05327
AK137711	0.355165	0.577313	0.792708
AK087429	0.355282	0.506772	1.00917
AK086969	0.356372	1.35046	1.34121
AK007874	0.356515	1.01563	0.47285
AK038239	0.35663	0.740083	0.789384
AK021354	0.356654	0.923954	0.869962
AK047257	0.356669	0.406946	0.318483
AK017542	0.356671	0.360493	0.223072
AK018619	0.357001	1.05812	1.35667
AK041202	0.357173	0.262955	0.574732
AK141540	0.357551	0.227157	0.44908
AK135864	0.358106	0.459497	1.27742
XR_108193.1	0.358571	1.14658	0.940036
XR_107519.1	0.359063	0.74836	0.341567
AK146140	0.359336	0.490104	1.041
AK088445	0.359439	0.758262	0.540516
AK032928	0.360118	0.756565	1.12892
AK035431	0.3606	0.499	0.927
AK018584	0.360632	0.560411	0.631289
XR_168908.1	0.360887	0.869691	1.60193
XR_104822.3	0.361225	0.340723	0.413378
AK142537	0.361265	0.525854	1.07941
AK080942	0.361302	0.549089	1.14733
AK044745	0.361325	0.604135	0.634398
AK141503	0.36136	0.684079	1.36959
NR_030488.1	0.361549	0.393831	0.845528
NR_027515.1	0.361823	0.539886	0.752532
AK045047	0.361886	0.703368	0.656995
AK135829	0.362343	0.829776	0.954023
AK082129	0.362746	0.800434	0.876434
AK037717	0.363569	0.542273	0.741558
AK043162	0.364259	1.2391	0.712329
AK019231	0.364449	0.412513	0.552907
AK039906	0.36522	0.904011	1.04799
AK031070	0.365782	0.918879	1.20747
AK003764	0.366651	0.240189	0.238046
AK156227	0.366924	0.73974	0.894149
AK164571	0.367124	0.734249	0.580372
AK046354	0.367853	0.863348	1.71621
AK090298	0.368068	0.515046	1.10781
XR_106630.2	0.368144	0.719468	0.363317
AK083876	0.368401	0.717195	1.42232
AK040759	0.368973	0.615124	0.889866
AK045253	0.36905	0.548123	1.10505
AK049972	0.369331	0.799439	0.900421
AK153902	0.369521	0.38934	1.04566
AK158721	0.370079	0.862642	1.79265
AK139982	0.370653	0.901287	0.510575
AK006736	0.37095	0.770788	0.795356
AK008535	0.371194	1.98569	1.53243
AK046922	0.371562	0.441305	1.0992
AK037990	0.372375	0.266449	1.49277
AK038542	0.373466	0.513585	1.07429
AK077985	0.373719	0.530755	0.489282
AK043614	0.373836	0.531375	0.863193
AK087081	0.373962	0.726771	0.859587
AK046575	0.373997	0.917068	0.886035
AK020154	0.374773	0.745917	1.27314
AK003876	0.374788	1.4447	0.301695
AK086311	0.374965	0.966657	0.376095
XR_107687.1	0.375036	0.491382	1.08877
AK031700	0.375047	0.305939	0.587785
NR_033573.1	0.375189	0.410256	0.99359
AK033651	0.37536	0.788168	0.851318
AK085320	0.375913	0.434777	0.279973
AK052131	0.376016	0.628209	0.842054
AK046295	0.376104	0.819221	1.12208
AK157472	0.376203	0.938936	1.40114
XR_141448.1	0.376621	0.296145	1.43702
AK034363	0.376686	1.16499	0.84469
AK043000	0.376875	0.92625	1.71667
AK004529	0.377317	0.801674	0.753438
AK035275	0.377343	0.378415	0.373862
AK032775	0.377827	0.489636	0.885992
AK043581	0.378182	1.00574	0.964684
AK011078	0.378437	0.570918	0.730465
AK088726	0.378519	0.699687	1.34307
AK037414	0.378601	0.59295	0.586151
AK084758	0.378688	0.493555	0.490117
AK082104	0.379043	0.579548	0.609537
AK044101	0.37956	0.508517	1.03429
AK048535	0.379565	0.746698	1.18531
AK045014	0.379592	1.00758	0.805831
AK053011	0.379996	0.42623	0.80641
AK049479	0.380172	0.596359	1.19197
XR_168462.1	0.38024	0.559146	1.04753
NR_027934.1	0.380512	0.667392	0.999183
AK084527	0.380605	0.796573	1.08531
AK046766	0.380647	0.415418	0.781654
AK080102	0.380767	0.645359	0.908838
AK003907	0.381089	0.768863	1.4957
AK160305	0.381625	0.750687	0.844523
AK089893	0.38177	0.633486	1.00114
XR_142144.1	0.381776	0.85544	1.49298
AK144364	0.38181	0.288717	0.992707
AK035708	0.382053	0.601525	1.03507
AK043384	0.383436	0.732252	1.24058
AK133643	0.383582	0.386135	0.772269
AK168062	0.383948	0.725054	1.20445
AK036185	0.384147	0.292708	0.529465
AK038846	0.38456	1.04789	1.2802
AK170049	0.384663	0.700905	1.01544
AK087161	0.384916	0.61869	0.675781
AK050296	0.385142	1.15434	0.200851
AK038046	0.385578	0.640544	0.484626
AK144944	0.38591	0.727868	0.979426
XR_106026.1	0.386336	1.18622	0.961911
AK039836	0.386345	0.631727	1.3012
AK037688	0.3868	0.840113	0.940138
AK089577	0.387652	1.19112	0.298364
AK150198	0.388303	1.08533	0.977948
NR_040600.1	0.388722	0.225955	0.409918
AK047697	0.389196	0.349126	1.23932
AK134935	0.389547	0.52354	0.732845
AK054153	0.389926	0.967567	0.675485
AK004466	0.390567	0.804096	0.328765
NR_027759.1	0.390696	0.57604	0.440428
AK035822	0.391015	0.334928	0.550505
AK047186	0.391696	0.466128	1.1308
AK021260	0.392491	0.745814	0.784779
AK135241	0.392917	0.502917	1.10208
AK080088	0.393302	0.598093	0.1813
AK048827	0.394003	0.858496	0.778012
AK013576	0.394093	0.920842	0.435246
AK003347	0.39429	1.09402	0.782304
AK028166	0.394398	0.979395	0.7302
AK048076	0.394562	0.83719	1.30159
AK136331	0.394742	0.441745	0.937463
AK031095	0.394803	0.614531	0.781029
AK051977	0.395245	0.722746	0.988336
AK084380	0.395477	0.958794	1.5397
AK053770	0.395486	0.544433	0.753888
AK081516	0.395636	0.321806	0.765061
AK161462	0.395833	0.751524	0.99187
AK133256	0.396226	0.72401	1.27229
AK150949	0.396245	1.47085	0.884881
AK137229	0.396262	0.56342	1.0111
AK144374	0.396286	2.41777	1.63024
AK131583	0.39641	0.421578	0.12924
AK042004	0.396418	0.425783	0.91231
AK083595	0.396816	0.842547	0.844863
XR_168521.1	0.397606	0.542111	0.0637941
AK136624	0.397805	0.528919	0.800074
AK161861	0.398232	0.411087	0.68586
AK052769	0.398305	0.936115	1.19361
AK138771	0.398545	0.522231	0.440582
AK038422	0.399087	0.752028	1.15467
AK033785	0.399286	0.715961	1.78021
AK040398	0.399318	0.423008	0.929828
AK082397	0.399394	0.519515	1.1817
XR_140687.2	0.399638	0.653802	0.257638
AK037544	0.399671	0.834704	1.03906
AK138605	0.399907	0.811515	0.708874
AK046587	0.399976	0.698044	0.351634
AK135930	0.400124	0.648766	0.658079
AK157063	0.400484	0.702125	1.03497
NR_030455.1	0.400645	0.525369	0.401663
AK083762	0.400727	0.562687	1.09863
AK080672	0.400738	0.611977	1.12592
AK052372	0.400881	2.29155	1.2511
AK029740	0.401052	0.458904	0.556018
AK147070	0.40109	0.435422	1.77493
AK139189	0.401259	0.73154	1.14024
AK030926	0.402015	0.462821	0.859625
AK017428	0.402575	0.969957	1.47897
AK085249	0.402859	0.360909	0.51371
AK040535	0.403155	0.574864	0.892682
AK040741	0.403703	0.38109	1.12764
AK048729	0.403764	0.653372	0.953399
AK032729	0.404311	0.475254	0.289317
XR_140884.1	0.404553	1.08854	0.0433466
NR_045274.1	0.405	0.614167	1.38083
XR_141059.1	0.405719	0.707485	0.252145
AK156094	0.405793	0.948852	0.16023
AK086685	0.406241	0.455319	0.927943
AK032637	0.406425	0.827047	2.17198
AK030421	0.406429	0.962126	1.56906
AK048200	0.406471	0.68906	0.753335
AK053239	0.406671	0.550085	0.964346
AK020205	0.40671	0.494307	0.589191
AK050464	0.406941	0.778032	1.20862
AK048965	0.407004	0.52863	1.46563
AK148133	0.407088	0.529095	1.45726
	0.407683	1.21326	1.15383
AK036821	0.4077	0.692991	1.6308
AK039507	0.408284	0.735371	1.10848
AK002796	0.408534	1.43515	1.41149
AK084464	0.408538	0.74567	0.495746
AK036372	0.40916	1.38683	1.48637
AK051577	0.409338	0.389619	0.540571
NR_033571.1	0.409432	0.479434	0.684885
AK078153	0.409795	0.44417	1.36806
AK006963	0.409984	0.450858	0.337285
AK140875	0.410493	0.599519	0.99159
AK077431	0.410634	0.812497	0.922844
AK036120	0.410727	0.390569	0.683225
AK141835	0.410886	1.35928	1.80037
AK138021	0.411324	0.441812	1.13206
AK018932	0.411577	0.818723	0.839219
AK077906	0.411634	0.615413	0.842164
AK162986	0.412757	0.804428	0.849236
AK028771	0.412819	0.738186	0.899511
AK165333	0.413083	0.901272	1.29437
AK079586	0.413542	0.895799	1.62169
AK143563	0.413899	0.503832	1.17118
AK144316	0.414409	1.00493	1.15333
AK018314	0.415698	0.496256	0.811257
AK048214	0.415785	0.856668	0.908074
AK085382	0.416056	0.569673	0.667592
AK136028	0.416058	0.901792	1.17651
AK080247	0.416107	0.589709	1.233
XR_142017.2	0.416117	0.460343	0.302077
AK040816	0.416383	0.690007	1.33956
NR_033621.1	0.416478	0.927569	0.828882
AK086540	0.41662	0.786775	1.13817
AK002615	0.416866	0.61257	0.899761
AK041779	0.417039	0.758846	0.710752
AK045431	0.417332	0.668187	1.72634
AK081927	0.417585	0.753018	0.58189
AK088972	0.417853	0.856762	1.06346
AK140123	0.418244	0.514876	0.416523
AK047554	0.41881	0.710392	0.345544
AK020191	0.418907	0.877044	2.27689
AK048573	0.419738	0.685913	1.08559
AK172527	0.420022	0.209184	1.76381
AK156563	0.420232	1.40954	0.615865
XR_168810.1	0.420561	0.322177	0.137661
AK040266	0.420804	0.64944	0.962303
AK136947	0.421176	0.99451	0.786667
AK080792	0.421432	0.713681	0.487505
AK020651	0.421728	0.510002	0.775729
AK042799	0.422018	1.00172	1.4461
AK143979	0.4221	0.902051	1.73385
NR_029764.1	0.422256	0.820122	0.638211
AK085851	0.422512	0.555727	0.948636
AK054377	0.422589	0.393401	0.690911
AK013718	0.422669	0.958686	0.830508
AK020662	0.422675	0.431296	1.55381
AK034279	0.422823	0.817633	0.688547
AK078466	0.423005	1.09856	1.15607
AK004457	0.423363	0.288906	0.723442
AK044532	0.423687	0.403904	0.536617
AK087214	0.423751	0.927257	1.48422
NR_002875.2	0.424422	0.489688	0.214332
AK140192	0.424689	0.842699	0.76094
AK083931	0.424959	0.696587	0.613509
NR_033509.1	0.424965	0.748495	1.05188
AK037667	0.425518	1.02259	1.23865
AK142750	0.425551	0.418119	0.231171
AK030969	0.425573	0.691575	0.789223
AK087034	0.425661	0.770762	1.57496
AK170668	0.425731	0.945096	0.264283
AK045825	0.426008	0.782471	0.449508
AK044362	0.426606	0.740826	1.41972
AK132953	0.426744	0.467387	0.946426
AK053249	0.427139	0.631986	1.91591
AK054524	0.427298	0.731367	0.97668
AK155940	0.427362	0.678185	1.07969
AK133422	0.427764	1.047	0.724309
AK156493	0.427776	1.11326	1.48199
AK016885	0.427829	0.695055	0.726243
AK169981	0.42787	0.949674	2.33262
AK160709	0.428177	0.695343	1.11957
AK007961	0.42825	1.04798	0.990313
AK053907	0.429172	0.545978	0.70084
AK149074	0.429588	1.18315	0.89176
NR_073193.1	0.429605	0.744018	0.867557
AK051827	0.429632	0.53472	1.08244
AK040633	0.429918	0.589918	0.564845
AK136595	0.429938	0.727068	1.565
AK053444	0.429978	0.414541	1.24116
AK088099	0.430007	0.485197	0.757675
AK079435	0.430387	0.3083	0.604082
AK048777	0.430547	0.809554	1.2181
AK089690	0.430665	0.923337	0.836528
AK087007	0.430721	0.927273	0.881505
NR_038073.1	0.431043	0.435409	0.836504
AK053590	0.431914	0.61911	0.379482
AK028659	0.432347	0.766913	1.26057
AK087869	0.432355	0.689695	0.576281
AK142297	0.43241	0.447355	1.1775
AK041502	0.432915	0.841971	0.882976
AK041558	0.43346	1.05269	0.782184
XR_140446.1	0.433514	0.551252	0.939065
AK158132	0.433534	0.680146	1.58433
AK145418	0.433671	0.94163	1.37916
AK140790	0.433744	0.578384	0.250758
AK048557	0.4338	0.937362	0.697986
AK082274	0.433954	0.551601	0.599749
AK040132	0.434	0.871333	0.994667
AK011283	0.434025	0.639297	1.24284
AK007229	0.434066	0.650599	1.12937
NR_073368.1	0.434229	0.757081	0.629381
AK035217	0.434356	0.462764	0.850923
AK006718	0.434408	0.679528	0.954607
AK142540	0.434631	0.494502	0.603421
AK077293	0.435234	0.523481	0.708087
AK143361	0.435591	0.365327	0.892537
AK138019	0.435613	0.674605	0.405705
AK032425	0.436159	1.22711	1.8714
AK029668	0.436245	0.981928	0.5625
AK081632	0.436359	0.668229	1.22052
AK033275	0.436831	0.593362	0.67666
XR_168744.1	0.437063	0.731269	1.13287
AK029385	0.437077	0.437914	1.0551
AK019750	0.437335	0.620114	0.56197
NR_015523.2	0.437602	1.19328	0.350349
AK078497	0.43779	0.821523	0.933713
AK017205	0.437865	0.47606	0.651499
AK018460	0.43787	0.707398	0.681361
XR_106750.1	0.43835	0.676337	0.962829
AK012299	0.438678	0.502588	0.709918
AK051933	0.438681	0.472346	1.26245
AK158089	0.438808	0.64069	1.40638
AK015629	0.438907	0.415756	0.524598
AK133995	0.438936	0.49644	0.942765
AK045919	0.439286	0.563534	0.828195
AK017805	0.439809	0.749829	0.755557
AK041129	0.440189	0.90218	0.652917
AK043359	0.440275	0.410413	0.678862
AK135044	0.440362	0.496666	0.842347
AK165532	0.440493	1.12978	0.166691
AK156799	0.440757	0.438749	0.764507
AK135961	0.441428	0.648196	0.577166
AK086972	0.441857	0.543824	0.844375
AK084783	0.44196	0.768104	1.40948
AK085009	0.442506	0.425257	0.923139
AK039946	0.442839	0.542716	1.17994
NR_045432.1	0.443281	0.760211	0.860474
AK149731	0.443378	0.630998	1.32845
AK148191	0.44367	0.977933	0.886594
AK140116	0.443723	0.687013	0.884848
AK036001	0.443872	0.784748	1.21821
AK050353	0.444126	0.435024	1.08495
NR_015514.2	0.444444	0.817851	0.909706
AK017827	0.444843	1.08585	1.14765
AK049984	0.445177	0.714168	0.97515
AK054363	0.445218	0.770581	1.17373
AK083604	0.446154	0.671914	0.796422
AK030605	0.446667	1.21333	0.952
AK083703	0.44692	0.853211	1.04522
AK142331	0.447548	0.720043	0.554371
AK020791	0.447739	0.659065	0.594451
AK027261	0.44816	0.836471	1.28266
AK165621	0.448877	0.436125	0.575807
AK015648	0.449176	0.596939	0.755691
AK086084	0.449187	1.00407	0.961382
AK020820	0.449587	0.589112	1.12246
AK087993	0.450439	0.601631	1.21455
AK038539	0.450586	0.589663	1.00476
AK078832	0.450606	0.762187	0.823575
AK047059	0.450621	0.675563	1.07084
AK034201	0.450784	1.74922	0.670929
AK157251	0.450822	0.713492	0.155057
AK090248	0.451107	0.75738	1.42435
AK043887	0.451167	0.516863	2.3667
AK157047	0.451729	0.630445	0.824427
AK142457	0.451974	0.580309	1.35512
AK053008	0.452011	0.611856	0.746648
XR_035225.1	0.452229	0.931938	1.29337
AK142538	0.452395	0.520993	1
NR_045426.1	0.452496	0.746108	0.50671
AK140093	0.452669	0.472409	0.327277
AK155941	0.452706	0.531163	0.733832
AK003469	0.452715	0.638026	1.00184
AK155575	0.452715	0.53324	0.460206
AK148503	0.452769	0.718961	0.712894
AK037349	0.45284	0.410891	1.36139
AK140585	0.453001	0.694591	0.818602
AK081204	0.45317	1.07795	1.73647
XR_168775.1	0.45319	1.31069	1.16239
AK017510	0.453239	0.300967	0.381936
AK050555	0.453453	0.668729	1.35261
AK035396	0.453648	0.377982	1.09159
AK162749	0.453672	0.956616	1.47335
AK049072	0.453684	0.545188	1.14092
AK079032	0.454144	0.759285	0.173258
AK087502	0.454545	0.795296	0.602034
AK032136	0.454988	0.935405	1.0115
AK141107	0.455185	0.690554	1.04815
AK053192	0.455293	0.389134	0.553128
AK080838	0.455497	0.640376	2.49309
AK157899	0.455547	0.456082	1.17535
AK016120	0.455561	0.623046	1.05717
AK053129	0.455995	0.414787	0.621672
AK139801	0.456102	0.899473	1.43986
AK003228	0.456197	0.584113	0.814253
AK165218	0.456476	0.533319	1.69492
AK041769	0.456649	0.730915	0.678411
AK028413	0.456756	0.399689	0.92739
AK046589	0.456904	0.621372	1.18426
AK041227	0.457428	0.89314	1.08135
AK018746	0.457523	0.967412	0.800097
AK041289	0.457662	0.780488	0.99908
AK138643	0.45838	1.83503	2.41507
AK039278	0.458432	0.509509	0.806967
NR_029544.1	0.458664	0.892978	0.606455
AK084533	0.459037	0.77611	1.08193
AK054148	0.459238	0.742885	0.75205
AK151137	0.459488	1.04664	1.28518
XR_168889.1	0.459965	0.697838	1.16423
AK020322	0.460028	1.89527	0.515819
AK034541	0.460684	0.466416	0.794197
AK087086	0.460797	0.838652	0.618184
AK033073	0.460939	0.446996	0.709863
AK049526	0.461144	0.985739	0.797148
AK131579	0.461483	1.05435	0.305243
AK049056	0.461488	1.08427	0.823568
AK171814	0.461538	0.802671	0.808189
AK169707	0.461587	0.588616	0.904435
AK087340	0.461623	0.497011	1.07598
XR_140879.1	0.461796	0.570106	0.653801
AK040748	0.462007	0.74098	0.264277
AK162645	0.462172	0.576774	0.885281
AK157105	0.462309	0.480677	0.671756
AK153683	0.463636	0.891444	0.917647
AK154670	0.463913	0.658781	1.20008
AK017116	0.464345	0.368932	0.70539
AK142450	0.464539	0.456541	0.616339
AK137242	0.464686	0.593399	0.950495
AK079922	0.464688	0.428152	0.61132
NR_003547.2	0.464908	0.856743	1.10719
AK160823	0.46522	0.489907	0.837836
AK077481	0.465441	1.35384	1.52949
AK086612	0.465451	0.799018	0.541564
AK008586	0.465459	0.567393	1.07031
NR_046046.1	0.465517	0.621879	0.655172
XR_140856.1	0.465661	1.0333	1.79865
AK015358	0.465878	0.469595	0.987838
NR_033136.1	0.466247	1.58357	0.551048
NR_040547.1	0.466262	0.584795	1.05567
AK008271	0.466408	1.0491	1.49289
AK047255	0.466503	0.281573	0.209051
AK155837	0.466931	0.70893	0.707711
NR_028381.1	0.466976	0.379219	0.814825
AK155757	0.46728	0.898773	1.0772
AK086332	0.467532	0.619989	0.779221
AK045878	0.467655	0.904983	0.812833
AK006385	0.46784	0.584078	1.4152
AK083529	0.467863	0.627295	1.00292
AK045166	0.467987	0.551813	0.920031
AK165749	0.468421	0.402141	0.272385
AK163511	0.468564	0.852416	0.954997
AK045222	0.46871	1.11941	1.32822
AK004057	0.468812	0.682745	1.17145
AK156347	0.469139	0.864627	1.2194
AK049735	0.469251	1.89572	0.69697
AK137623	0.469687	0.700023	0.236646
XR_168409.1	0.469765	0.63601	0.99475
AK017909	0.469965	0.354497	0.911105
AK017515	0.470049	0.351059	0.746129
AK017755	0.470123	0.545086	0.623496
AK162045	0.47023	0.83576	0.213272
XR_034260.2	0.470419	0.621557	0.547545
AK013598	0.470543	0.827519	1.45155
AK045212	0.470567	0.931084	1.38837
NR_028310.1	0.470904	1.16041	1.11447
AK016582	0.47123	0.402405	0.751711
AK048474	0.47158	0.804782	1.23834
AK048068	0.472166	0.66924	0.640796
AK142204	0.472263	0.675012	1.2106
AK051456	0.472552	1.16984	1.8538
AK148850	0.472768	0.911216	1.93882
AK042276	0.4738	0.2586	1.0098
AK141461	0.473941	0.332463	0.8575
AK088302	0.473955	0.829678	1.061
NR_029762.1	0.474141	0.687052	0.994715
XR_168481.1	0.474637	0.460645	0.536645
AK048349	0.475444	0.553814	1.02952
XR_107385.1	0.475583	0.713374	0.309943
AK147100	0.475878	1.20071	0.910959
AK036714	0.476148	1.07426	1.49775
AK136811	0.476505	0.790015	1.42658
AK011626	0.476912	1.08453	0.975079
AK135812	0.477771	0.71894	1.088
AK035380	0.477817	0.599136	0.779741
AK004796	0.477824	0.90695	0.858939
XR_141522.1	0.477948	0.566156	1.18029
AK005746	0.478222	0.552481	0.500446
AK156022	0.478251	0.635607	1.02258
XR_107257.1	0.478277	1.05693	0.7603
AK136783	0.478636	0.813636	0.807727
AK005093	0.478891	0.750621	0.679636
AK086474	0.479288	0.809802	1.54551
AK039806	0.47967	0.493427	0.720575
AK038277	0.47968	0.982143	0.733374
AK089955	0.479682	0.624264	0.960836
AK043230	0.48038	0.694794	1.40754
AK042673	0.480829	0.813126	1.15406
AK008987	0.481074	1.00162	0.706567
AK140335	0.481124	0.605795	0.236172
AK036171	0.481265	0.728923	0.891101
AK053505	0.481307	0.954722	1.11188
AK135822	0.481884	0.721532	0.95264
AK051171	0.482001	0.922514	1.00732
AK037413	0.48201	1.00305	0.505092
NR_028376.1	0.482126	0.754119	0.673298
AK034691	0.482153	0.757615	0.845076
AK010190	0.482274	0.898833	1.04907
AK033479	0.482401	0.402433	0.741849
NR_033785.1	0.482499	0.502646	1.14387
AK035339	0.48292	0.67588	1.17866
AK049594	0.482951	1.3695	1.66026
AK158816	0.483059	0.710064	1.65458
AK171408	0.483186	0.428677	0.965447
AK020619	0.483246	0.444951	0.667654
AK166295	0.483462	1.08937	0.571429
AK052029	0.483491	0.980739	1.15134
AK140519	0.483582	0.947974	0.793177
AK047430	0.483861	0.35665	0.920606
AK135387	0.484162	0.999018	0.770501
AK019769	0.484307	0.683983	0.930195
AK161820	0.484622	0.852988	0.733312
AK042466	0.484733	1.14882	0.741471
AK084980	0.484805	1.13821	1.03329
AK047786	0.484938	0.434057	0.794366
AK136784	0.485017	0.625561	0.788652
AK019439	0.485024	1.09967	1.64385
AK039473	0.485397	0.430258	1.173
AK085608	0.485399	1.72472	2.51781
AK037866	0.485486	0.643807	0.421021
AK020576	0.485558	0.507958	0.755032
AK043328	0.485735	1.12171	1.61504
XR_105587.1	0.485955	1.55389	2.15346
AK037830	0.486058	0.843713	1.6294
AK078449	0.486059	0.307364	0.448573
AK048798	0.486069	0.656966	1.17076
AK020425	0.48651	0.419276	0.931034
AK051481	0.486596	0.943136	1.51097
XR_107237.1	0.487672	0.538417	0.731365
AK053682	0.487925	0.370542	0.571047
AK157557	0.488281	0.589844	0.656684
AK170112	0.48833	1.09785	0.239677
AK161101	0.488477	0.548832	0.940063
AK045578	0.488531	0.41447	0.840898
AK031031	0.488806	0.628541	0.570398
AK030114	0.488824	0.60022	0.965555
AK086595	0.489461	0.51733	0.22178
AK082972	0.489653	0.487908	0.873348
NR_030688.1	0.490002	2.69501	0.83498
AK045245	0.490057	0.75142	0.98402
AK032655	0.490231	0.586354	1.69847
AK143353	0.490246	1.19969	2.66376
AK080220	0.490745	1.0299	0.722354
AK142865	0.491246	0.767884	1.51576
AK156719	0.491513	1.16384	0.486347
AK030597	0.491601	0.57963	1.42952
AK170250	0.492295	0.811329	1.40858
XR_107876.1	0.492371	0.856221	1.13498
AK013093	0.492861	0.535256	0.44544
AK087314	0.493134	0.8021	1.09693
NR_037189.1	0.493256	0.72918	0.82659
XR_106647.2	0.49359	0.828526	0.539263
AK082373	0.49369	0.476863	0.622296
AK040823	0.493902	0.921748	1.68699
AK003536	0.494033	0.710024	2.47056
AK041460	0.494493	0.693442	1.24169
AK153591	0.494505	0.623096	0.181608
AK046788	0.494606	0.945665	0.600479
AK082216	0.495142	0.847768	0.262498
AK043469	0.495202	0.589827	1.03637
AK132986	0.495323	0.466538	0.175598
AK155613	0.495465	0.962963	2.12169
AK039127	0.49559	0.88258	0.696803
XR_140752.1	0.495637	1.0924	1.60346
AK078339	0.496015	0.47661	0.824415
AK086044	0.496122	0.861874	1.10263
AK031292	0.496232	0.739389	1.34748
AK033383	0.496408	0.602547	1.34749
XR_106003.1	0.496644	0.708359	1.17999
AK132799	0.496828	0.222534	0.338966
AK138356	0.496971	1.33396	1.25135
AK037982	0.497293	0.735499	0.236272
AK017073	0.497415	1.4969	1.21044
NR_027875.1	0.498084	0.443554	0.36777
AK049808	0.498283	0.750057	0.630579
AK078580	0.498428	0.930818	0.473585
AK138122	0.498452	0.964669	1.42051
AK037356	0.498526	0.558018	1.19092
AK154397	0.498733	0.655287	0.382051
AK086635	0.498933	0.762112	1.16702
AK032135	0.499117	1.04108	0.699647
AK040825	0.499332	0.480641	0.781375
AK138162	0.499378	0.637905	1.21591
AK135454	0.49945	0.640161	0.695126
AK081570	0.499495	0.842477	0.877819
AK138930	0.499595	1.13846	1.05891
AK084612	0.499663	0.705327	0.987862
AK011661	0.499705	1.17619	1.28698
AK133691	0.499958	0.537644	0.889318
AK135806	0.5	0.352347	0.993682
AK089730	2	2.77387	2.06784
AK020693	2.0015	2.01053	1.33985
AK084566	2.00169	1.15852	1.83811
AK049978	2.00172	1.94488	2.06632
AK015539	2.00188	1.85284	0.469205
AK009001	2.0042	1.11048	0.983411
AK051198	2.00467	1.85692	2.19129
AK043309	2.00468	2.72648	0.484955
NR_038297.1	2.00506	1.17146	0.586794
AK031577	2.00579	1.16795	1.9749
AK038095	2.00609	2.82953	1.59361
NR_039593.1	2.00697	1.26132	1.89024
AK028088	2.00724	1.37337	2.05644
AK083657	2.00749	2.10279	1
AK008065	2.00823	1.25377	1.04252
AK038713	2.00835	1.12354	2.24875
XR_105542.3	2.00873	3.30185	1.32238
AK029232	2.00881	1.48924	0.998043
AK005165	2.00971	4.40103	4.03678
AK157510	2.0104	2.25156	1.20998
XR_168671.1	2.01157	1.60992	1.95372
AK005755	2.01274	2.10403	2.35244
NR_046179.1	2.01305	2.15434	1.36158
AK158188	2.0131	1.91224	2.21759
AK077964	2.01349	2.13828	2.47049
AK131748	2.01427	4.72079	2.71276
XR_105118.1	2.01505	1.55366	1.74738
XR_168791.1	2.01534	0.935078	1.11822
AK013461	2.01549	1.40564	2.47477
AK043852	2.01565	1.88998	0.944097
NR_038041.1	2.01586	5.6997	0.928642
AK149947	2.01623	1.6526	0.987374
AK146636	2.0163	1.15422	0.735447
AK138941	2.01685	3.2268	1.08423
XR_168397.1	2.01711	1.43287	1.27222
AK083695	2.01711	1.06843	2.51166
AK139041	2.01818	1.77578	0.663055
NR_029640.1	2.0182	1.16187	1.89827
AK164166	2.01908	2.44669	0.869809
NR_030437.1	2.02048	3.49196	0.304364
AK086229	2.02083	3.12689	2.27273
AK053912	2.02155	1.49214	0.828347
AK017125	2.02206	3.74311	0.52114
AK020828	2.02243	1.47178	0.968162
AK054507	2.02249	1.97648	3.22188
AK008220	2.02294	3.33412	0.685882
AK054506	2.02318	2.05872	0.409629
NR_039563.1	2.02332	1.83402	31.1934
AK048896	2.0234	2.49847	3.13021
AK142812	2.02377	3.20919	2.69255
AK139582	2.02445	3.27506	3.00856
AK038398	2.02472	1.6128	0.144395
XR_106666.2	2.02539	0.738239	0.470921
AK031791	2.02549	2.63676	2.53578
AK158605	2.02595	2.28942	1.99202
AK033318	2.02603	1.48319	0.696312
AK033174	2.02606	1.70649	1.89331
AK080508	2.02613	0.998033	0.388311
AK134871	2.02703	1.46929	2.37531
AK046854	2.02747	2.93223	3.14835
AK087662	2.02795	2.51845	1.37842
AK047823	2.02906	1.46192	1.59419
AK170675	2.02972	2.04863	0.436806
AK006053	2.02973	0.952025	1.7923
AK079218	2.0304	1.24044	1.03674
AK004153	2.0308	2.36955	2.73653
AK005761	2.03084	2.56718	1.40308
AK078984	2.03139	4.22946	3.1819
AK158528	2.03175	1.7478	1.9224
NR_045078.1	2.03191	2.39231	1.24656
AK044545	2.03193	3.5249	1.58493
XR_105345.1	2.03202	1.48879	1.22412
NR_033506.1	2.03204	2.3271	3.69159
NR_035447.1	2.03299	2.60619	3.60206
AK086789	2.03301	1.9621	1.37531
AK017498	2.03302	3.25708	3.95047
AK046603	2.03314	0.950297	2.36109
AK142523	2.0335	1.81072	2.71189
AK052007	2.03372	1.2522	0.76393
AK009233	2.03421	1.59824	3.0208
AK045772	2.03424	3.97674	2.30036
NR_030149.1	2.03509	1.11306	1.91033
AK084814	2.03574	0.989122	2.14219
NR_030645.1	2.0373	0.405556	0.399206
AK081639	2.03822	1.6603	2.15428
AK019641	2.03846	1.62254	1.64222
AK006573	2.03853	2.34495	5.53945
AK075842	2.03867	1.17058	0.449583
AK033898	2.03915	1.44279	0.44703
AK086838	2.0393	1.58118	1.9196
NR_030470.1	2.03934	1.56066	1.23279
AK076733	2.03963	0.922185	0.57709
AK034610	2.03981	2.62898	1.61943
AK047923	2.04	4.1619	2.62667
AK034020	2.0407	2.00388	1.79845
AK084147	2.0407	1.27243	0.642857
AK141058	2.04104	3.03056	0.360606
AK135795	2.04279	2.21712	2.25674
AK085746	2.04469	1.59032	2.10428
AK019615	2.04471	1.9422	1.52672
AK047574	2.04502	1.45659	1.19614
AK039284	2.04523	1.8928	1.86767
AK014666	2.04561	1.98035	1.37263
XR_142083.1	2.04565	3.26663	2.46455
AK135618	2.04605	1.66752	1.23931
AK045754	2.04608	1.37713	1.18316
AK013492	2.04632	1.05887	1.64545
AK032891	2.04644	1.82381	2.31386
AK050674	2.0471	3.60789	2.70537
AK136511	2.04783	1.71035	0.421547
AK016406	2.04893	1.4119	0.497282
AK014675	2.04974	2.573	0.912791
AK156333	2.04989	4.26486	2.84289
AK139986	2.04992	1.29297	0.599089
AK146519	2.04993	3.31606	1.08335
AK077132	2.0501	2.32777	3.10647
AK051702	2.0503	1.38213	0.805001
AK138660	2.05031	1.83753	1.14046
NR_046180.1	2.05065	1.98263	1.60781
AK040935	2.05084	0.843816	0.435535
XR_140871.1	2.05102	1.42199	0.407839
AK088428	2.05117	1.55172	1.81869
NR_045042.1	2.05145	2.03514	0.824529
AK048510	2.05324	2.08927	3.00983
AK020072	2.05366	2.64529	1.06545
AK042008	2.05433	2.19763	2.27879
AK012228	2.05513	1.39722	1.19835
AK053277	2.05519	1.74285	1.1713
AK050402	2.05533	0.921837	0.921837
AK135811	2.05719	1.38084	1.3586
AK153673	2.05761	1.64746	1.41289
AK134394	2.05772	2.31701	0.780459
AK140115	2.05857	1.60038	0.513748
XR_142413.1	2.05891	1.40667	0.851668
AK139163	2.0591	3.72104	1.45508
AK029367	2.05913	1.87532	2.08612
AK036564	2.05923	2.277	2.04355
AK085909	2.05979	1.67532	0.924541
AK019674	2.06122	2.75714	2.31429
AK135370	2.06178	1.54458	3.75694
AK044816	2.06182	1.56723	2.32303
AK171763	2.06265	3.38253	2.47271
AK135563	2.06301	2.09146	1.02236
AK034159	2.06316	1.42024	1.24818
AK164210	2.06325	3.76988	1.66145
NR_040410.1	2.06346	1.72899	2.31046
AK164772	2.06373	1.31297	1.3313
XR_105961.1	2.06403	2.36286	0.639274
AK140878	2.06419	1.21061	0.386737
XR_142432.2	2.0643	1.51534	0.312557
AK089495	2.06433	0.842616	0.477586
AK133433	2.06478	4.14886	0.429461
AK085788	2.06479	0.899847	1.17469
AK044047	2.06574	2.78547	1.45502
AK019553	2.06624	2.20192	4.38374
AK141584	2.06627	1.93841	0.511711
AK079688	2.06653	2.625	3.55242
AK081271	2.06777	0.97686	2.1124
AK046443	2.06891	1.80609	1.42388
XR_107731.1	2.06961	1.33531	0.401528
AK011411	2.06974	2.44271	2.06974
AK034659	2.0699	1.84435	2.32586
AK042145	2.0701	3.12113	1.88763
XR_106640.2	2.07098	0.948599	0.859316
AK080188	2.07154	2.32311	1.0739
NR_004447.1	2.07225	1.05399	0.0811508
AK040356	2.0723	2.01838	0.666667
AK146131	2.07246	2.05402	2.26482
AK166944	2.07289	1.61217	2.42887
AK080929	2.07294	1.6817	1.74271
AK050752	2.07417	0.922973	0.181231
XR_141467.1	2.07491	3.7108	2.44425
AK052426	2.07504	3.01477	2.95793
AK015681	2.07504	1.91354	3.60033
AK161071	2.07522	1.31293	0.158092
XR_140507.1	2.07543	1.50611	1.1078
NR_038014.1	2.0759	1.81566	1.39036
AK082246	2.0771	1.40124	0.94879
XR_106425.1	2.0793	1.60683	1.57269
XR_104877.1	2.07938	2.68839	1.01663
AK131844	2.07948	2.75019	2.01474
AK014924	2.08004	1.42412	1.08524
AK087675	2.08032	1.38406	1.62808
NR_045819.1	2.08054	1.0326	0.312409
AK076596	2.08062	2.14292	0.612918
AK134229	2.08131	1.16436	1.51038
AK040023	2.08239	1.23263	2.07431
AK086983	2.08322	1.21651	1.88904
AK038132	2.08387	1.16546	0.904465
AK163896	2.08425	2.85531	1.46703
AK081141	2.08449	1.75623	0.929363
AK137824	2.08466	1.62963	1.44533
AK018407	2.0848	2.10573	2.96145
AK138327	2.08493	4.27176	0.887473
AK041575	2.08512	1.20052	1.19843
AK077835	2.08581	1.62266	0.812431
AK038647	2.08621	1.69601	1.07713
NR_040437.1	2.08622	1.56509	1.62032
AK042911	2.08657	3.01481	1.7463
AK132913	2.0866	1.87343	1.95781
AK043336	2.08713	1.5052	1.29736
AK048826	2.08749	1.58864	2.25019
AK082248	2.08751	1.42689	1.59658
AK034474	2.08758	1.77068	0.119006
AK045450	2.08783	1.61017	2.90139
NR_040641.1	2.08888	2.17547	0.401492
AK020287	2.08897	4.28289	1.98897
AK032432	2.089	1.39234	0.518979
AK050879	2.08909	1.72955	1.03091
AK039452	2.09019	3.35155	3.91014
XR_168909.1	2.09162	2.16099	4.66623
AK003529	2.09248	2.84729	1.29432
AK038985	2.09256	2.34889	2.86709
AK039415	2.0929	0.988767	0.966606
AK078346	2.09308	0.683393	0.200053
NR_004439.2	2.09309	1.45142	0.25461
AK015726	2.0937	2.56682	1.99386
AK043303	2.09408	3.51987	2.23236
AK035700	2.09413	2.00658	0.653447
AK019774	2.09455	1.6247	0.535938
AK078615	2.09552	1.68807	1.18888
AK086857	2.09747	2.92614	0.901661
AK088994	2.09788	4.60359	3.14845
AK089146	2.09866	1.73203	2.37272
AK086566	2.09903	1.71429	0.88474
AK041912	2.09905	2.65125	1.61091
AK049097	2.09968	2.39871	3.01125
AK042143	2.10029	1.46903	0.778761
AK153614	2.10071	1.66667	2.87389
AK054441	2.10147	2.2176	1.67359
XR_107038.1	2.10276	2.33812	1.21326
AK038802	2.10321	1.23911	0.842317
AK020676	2.10336	1.863	3.17676
AK083187	2.10348	1.28609	1.96348
AK040485	2.10372	1.86565	0.571991
AK020556	2.10414	2.57347	1.43937
AK087738	2.10472	2.19097	3.17864
AK021126	2.10489	1.95232	2.17402
AK159456	2.10519	2.48998	1.19103
AK142353	2.10557	2.16786	0.626596
AK164532	2.10562	0.942286	2.14102
AK044630	2.10689	1.38059	1.63059
AK047913	2.10825	2.62264	0.598113
AK149164	2.10866	1.54839	2.95076
AK038421	2.10886	1.71825	1.77908
XR_033143.2	2.10902	1.56929	1.49084
AK046923	2.10921	0.688781	0.506523
AK050790	2.10965	1.45548	2.04686
AK049136	2.11018	2.05053	1.42807
AK087056	2.11046	1.76468	1.90792
AK157208	2.11074	2.16033	2.15537
AK015082	2.11111	1.7957	2.03226
AK038861	2.11124	0.722015	0.571595
AK019875	2.11128	1.34384	1.13566
AK013649	2.11158	0.800586	1.28204
AK164810	2.11182	1.66737	2.16419
AK033430	2.11307	1.69828	0.172815
AK031651	2.11326	1.81906	1.83011
AK164739	2.11407	2.40644	0.237826
AK156482	2.11447	2.03559	2.20196
AK034041	2.11474	0.789686	1.56365
AK157641	2.11501	1.63308	0.82799
AK047443	2.11502	2.34641	2.78484
AK084781	2.11517	1.72652	2.50913
NR_030705.1	2.11541	1.26531	1.68614
AK007083	2.11608	2.722	0.431805
AK164207	2.1162	2.02455	2.19967
NR_038092.1	2.1172	2.46624	0.82293
AK044297	2.11725	1.79526	1.95079
AK046422	2.1175	2.91375	0.81625
AK149809	2.11783	2.32882	2.0824
NR_026596.1	2.11819	1.28379	0.961783
AK083230	2.11913	1.29978	1.20974
AK144587	2.11996	0.808499	1.45858
AK134062	2.12018	3.47343	3.86218
AK158565	2.12047	1.95477	1.75862
AK041443	2.12051	3.23335	1.78741
AK134197	2.12286	2.8979	2.76951
AK084908	2.12288	1.23676	1.56943
AK042985	2.12331	3.74952	0.927746
AK166708	2.12382	3.73748	1.22074
AK085802	2.1242	2.22134	1.16083
XR_140937.1	2.12489	1.0026	0.941023
AK032829	2.12607	1.37228	1.41799
AK046992	2.1272	3.02519	2.49118
AK032251	2.12738	2.47144	0.990027
AK156468	2.12757	1.87243	1.05851
AK138877	2.12764	1.28206	0.439547
AK031021	2.12789	2.81851	3.28015
AK019726	2.1281	1.54463	0.771901
AK143555	2.12825	2.73539	0.812662
AK043905	2.12826	1.8006	2.67435
AK016914	2.12855	2.31935	2.29905
AK087734	2.12865	0.777609	1.35787
AK132437	2.1292	2.38587	4.11714
NR_015467.1	2.13003	1.6065	1.79127
AK143722	2.1306	2.1384	0.996101
AK042257	2.1309	0.572389	0.202922
AK170983	2.13215	1.53951	5.24114
AK037775	2.1341	2.1954	2.58748
AK008544	2.13676	1.35887	0.227763
AK159293	2.13702	3.97365	5.24242
AK158787	2.13703	1.49933	2.06618
AK087154	2.13756	2.95518	2.93199
AK009949	2.13796	1.3662	0.309539
AK141275	2.13857	1.98659	1.66667
AK030860	2.14018	2.6733	1.19023
AK037868	2.14057	1.58857	1.60686
AK088978	2.14135	1.58045	2.1594
AK049062	2.14146	1.88005	0.720191
AK080547	2.14262	1.10034	1.76325
AK084220	2.1431	2.13004	1.22352
AK154154	2.14338	0.727291	0.183653
NR_038298.1	2.14367	1.23831	0.989819
AK085569	2.14378	1.5311	0.94777
AK080741	2.14447	2.65103	3.50657
AK141873	2.14469	2.13344	1.88585
AK015354	2.14481	2.11231	0.877993
AK084570	2.14651	0.622914	1.26973
AK144717	2.14757	2.82565	2.37609
AK015702	2.14773	1.0947	1.80303
AK080229	2.14785	1.59005	1.79435
XR_002317.3	2.14821	1.8375	1.66429
AK138651	2.14847	2.73265	2.76179
NR_029577.1	2.14873	2.38356	2.13699
AK087065	2.14907	2.12262	2.71039
AK033523	2.14971	0.982604	1.81286
AK048195	2.1506	2.43198	1.49303
XR_105372.1	2.15083	1.02825	1.27482
AK084630	2.15114	3.37386	0.447727
AK020816	2.15126	1.7584	1.96429
AK031819	2.15193	1.27296	0.764807
AK082557	2.15284	1.60408	1.9607
AK080808	2.15395	3.07084	2.69482
AK054448	2.15416	1.58621	2.0284
AK008046	2.1548	1.58763	2.75044
AK089184	2.15499	5.17197	3.3397
AK080595	2.1554	3.73558	1.23221
XR_168699.1	2.15645	1.69497	0.374575
AK040603	2.15742	1.22719	0.948122
AK052954	2.15874	1.70583	1.50583
AK136873	2.15889	1.05523	2.70821
AK156707	2.1592	2.30582	0.939713
AK144570	2.15927	0.777728	1.13177
AK085957	2.15972	1.97199	0.819827
AK011742	2.16	2.90667	2.31238
AK142492	2.16049	2.59965	3.37213
AK016882	2.16121	1.98837	0.488372
AK017536	2.16185	1.73572	4.04186
AK028512	2.16346	1.31287	0.061273
AK132628	2.16359	2.94606	1.1242
AK040636	2.16436	2.17665	2.78034
AK160669	2.16561	2.76433	1.83546
XR_105034.1	2.16627	1.141	0.822185
AK016935	2.16693	1.32597	0.621016
XR_106347.1	2.16707	4.29621	3.42938
AK082533	2.1675	0.944766	0.509924
AK053968	2.16757	2.1812	1.9564
XR_142258.1	2.16771	1.89407	0.739095
AK030071	2.16777	2.94652	2.73506
AK051507	2.16842	2.37399	2.46769
AK043703	2.16912	1.3781	1.15655
AK144272	2.1694	1.08925	2.54281
NR_033224.1	2.1702	1.82118	0.824496
AK040112	2.17022	4.36903	1.00566
AK158582	2.17056	1.34025	0.59032
AK086125	2.17095	2.00107	2.23205
AK029023	2.17136	2.03495	2.17477
NR_030435.1	2.17231	0.683503	0.849364
AK138921	2.17287	1.07905	0.698388
AK046729	2.17306	1.55989	2.17075
AK045906	2.17365	2.93229	2.72674
AK032367	2.17481	2.37189	1.3333
AK164737	2.17563	3.24373	2.08065
AK142264	2.17576	3.16242	3.5903
AK083635	2.17677	1.75036	1.8658
AK004409	2.17699	3.33628	2.27655
AK157456	2.17756	1.101	0.345768
AK142542	2.17851	3.59504	4.84132
AK049904	2.17925	2.51651	2.24528
AK139674	2.18011	2.71107	3.45966
AK084209	2.18011	2.36398	1.74109
NR_045425.1	2.18068	1.70688	0.813236
XR_168827.1	2.18075	1.50881	1.03787
AK047600	2.18142	1.82212	2.13009
AK134094	2.18182	2.6166	0.831357
AK011188	2.18272	1.04527	0.798173
AK031310	2.18277	2.39285	0.420821
AK034152	2.18341	1.49782	1.9476
NR_002452.2	2.18378	6.02548	2.01866
AK003390	2.18411	1.00944	1.22337
AK081049	2.18502	2.68051	1.54723
AK086188	2.1851	2.31023	2.78163
AK146406	2.18529	2.12172	0.490023
AK007945	2.18615	2.90476	4.56926
NR_030674.1	2.18675	2.73092	0.713353
AK018238	2.18782	2.54315	2.39763
AK133769	2.18782	2.06599	4.09814
XR_106594.1	2.18805	1.06649	2.20727
AK050784	2.18805	5.37942	1.84403
NR_040650.1	2.18896	3.73357	1.85267
AK135893	2.18975	1.97819	3.74264
AK016753	2.18988	3.19667	1.4091
AK037397	2.19251	2.51159	2.60428
NR_038019.1	2.19385	6.83185	4.38341
AK016186	2.19393	2.59696	1.77572
AK137303	2.19418	1.70283	0.504717
AK012894	2.19423	1.74103	1.32864
AK161472	2.19444	3.33681	2.76215
AK136073	2.19449	1.72287	1.81135
NR_029758.1	2.19578	1.85946	0.342707
AK080033	2.19598	0.98995	2.26298
AK031053	2.196	2.60906	2.60906
AK078763	2.1961	1.00878	1.24293
AK035377	2.1961	5.52662	2.00369
AK085025	2.19823	2.06903	2.50088
XR_105607.1	2.1993	2.11113	1.77122
AK075683	2.20008	2.05094	2.96752
AK161306	2.20159	1.95491	0.866048
AK154292	2.20231	3.00851	2.46841
AK016264	2.20257	1.65621	0.596291
AK079519	2.20385	2.38409	1.92915
AK003428	2.20391	10.2099	3.93798
NR_030493.1	2.2045	1.51552	0.576385
AK014704	2.20526	1.88012	0.372268
AK157285	2.20728	2.20669	1.8162
AK032710	2.20788	1.42495	0.969222
XR_106809.1	2.20888	3.46382	2.54605
XR_140497.1	2.21088	2.18966	1.99337
AK016907	2.21266	2.6737	2.00406
AK031920	2.21273	1.90182	3.05273
NR_040499.1	2.21317	1.9634	1.1903
AK052318	2.21324	2.58464	0.774837
AK136615	2.21348	1.2397	1.17041
AK084600	2.215	1.74851	2.00597
AK016244	2.21556	1.03528	0.755376
NR_030483.1	2.21616	0.978475	3.03141
AK006383	2.21784	2.50188	0.625636
AK162058	2.2181	1.73937	2.56379
NR_045972.1	2.21947	1.85626	2.62597
NR_037986.1	2.22023	1.34864	0.298184
AK078808	2.22168	2.09933	2.06965
AK144926	2.22285	1.18165	1.10674
AK138713	2.22467	2.02677	4.15583
AK045680	2.22478	1.69204	0.662832
NR_045975.1	2.22538	2.51136	3.45139
AK141184	2.22579	1.01568	1.32967
AK004309	2.22619	2.46729	0.902248
AK051936	2.22684	2.08318	2.26843
AK016119	2.22753	3.2884	2.76052
AK079492	2.22772	0.942239	0.42976
AK047551	2.23049	3.5164	1.13917
AK083568	2.2306	1.60532	2.29268
AK132197	2.23425	4.78191	2.77706
AK016924	2.23439	3.7908	2.96495
AK018340	2.23464	2.75419	1.65922
NR_045561.1	2.23543	1.83429	1.56114
AK044200	2.23647	2.89579	2.38677
AK086082	2.23701	2.60915	3.18711
AK142530	2.23717	2.60927	1.38742
AK037977	2.23736	1.51115	0.173111
XR_142036.1	2.23742	3.84748	4.49962
XR_141874.2	2.23773	1.64141	1.4912
AK033115	2.239	2.54525	0.832726
AK140745	2.24023	2.57164	3.96527
AK155310	2.24124	1.34725	1.28214
AK030873	2.24176	1.60065	0.44176
AK139724	2.24244	1.54487	2.05057
NR_029826.1	2.24286	0.998665	0.975167
AK085872	2.24301	3.86731	1.48441
AK137362	2.24321	1.96895	1.75291
AK003376	2.24328	1.11297	1.04961
AK007969	2.24361	1.58045	2.01203
AK015812	2.24379	1.56981	0.410088
AK052132	2.24471	1.69019	1.12059
AK163855	2.24624	2.92479	0.8
AK158564	2.24731	1.38232	0.467145
XR_107584.1	2.24754	1.75643	3.14875
AK087815	2.24784	0.943409	0.578864
AK045895	2.24785	2.75559	2.60413
AK051837	2.24871	1.34991	1.8542
AK040376	2.24962	1.54135	0.678195
AK087052	2.25076	0.652745	4.06938
AK088663	2.25219	2.14536	1.56918
AK082138	2.2522	2.43563	2.95414
AK041339	2.25272	1.15251	1.94771
AK085175	2.25301	0.824683	0.35002
XR_107227.1	2.25334	1.92195	0.877713
AK045112	2.25438	1.35576	0.795853
AK164085	2.25474	2.69895	2.32842
AK010832	2.25603	1.34694	0.53321
XR_107009.2	2.2561	3.22321	3.21287
AK131877	2.25867	1.10895	0.383108
NR_027895.1	2.2597	1.37131	0.378366
XR_108192.1	2.25993	2.50202	0.770767
AK137877	2.26025	2.44207	0.720143
AK043382	2.26059	1.77983	3.09547
XR_105734.1	2.26203	1.22576	1.9393
NR_029602.1	2.26422	2.25321	3.48073
AK004476	2.26538	2.09842	1.21441
AK042553	2.26651	1.87244	3.50797
AK155684	2.26667	1.50693	1.19913
AK081389	2.2675	1.77125	2.5
AK168884	2.2691	2.55849	0.577417
AK143741	2.27219	2.75937	2.25641
AK158390	2.27243	1.6709	0.189248
AK042416	2.27258	2.34373	4.32374
AK033843	2.27605	1.83897	1.83897
AK030791	2.27782	1.99282	1.75951
AK086089	2.27825	2.46037	2.44013
AK086440	2.27984	3.82626	2.89655
AK053720	2.28185	2.72008	3.41506
AK020587	2.28265	4.49391	1.19733
AK165145	2.28295	1.25439	1.9297
NR_035412.1	2.28308	0.874372	1.07538
AK165534	2.28312	3.50079	2.27524
XR_104969.1	2.28342	2.1836	2.13904
AK030847	2.28378	1.04173	0.591868
NR_045868.1	2.28638	1.50017	3.20465
AK009349	2.28669	1.65646	0.912536
AK044300	2.28669	4.08023	1.00978
AK172702	2.2871	2.85685	3.17077
AK018205	2.28718	2.22564	2.51795
XR_107321.1	2.28819	2.61632	1.50694
AK141881	2.28821	1.38915	1.4936
AK007279	2.28916	0.80809	1.39028
AK029402	2.28949	2.29932	1.00302
XR_140449.1	2.29	2.162	0.250667
AK007079	2.2904	3.89227	4.23185
AK085003	2.29162	1.57865	1.93226
NR_046037.1	2.29165	3.65218	0.976129
AK051181	2.29176	1.17489	0.995133
AK148475	2.29176	4.16327	2.08919
AK028998	2.29207	1.58594	0.704928
AK142133	2.29245	3.27864	3.35093
AK140166	2.29358	1.79358	2.43272
AK020800	2.29362	1.76489	0.505535
AK160196	2.29495	4.64875	1.31057
AK034924	2.29505	1.64058	0.421748
AK037619	2.29549	5.27295	5.97496
AK148567	2.29605	4.58553	2.84046
AK047074	2.29688	2.97098	5.15625
AK039232	2.29734	2.69767	2.08638
AK021147	2.29818	2.06182	2.50727
AK135251	2.299	2.57665	1.1495
AK139503	2.29936	2.28025	3.06051
AK021149	2.29952	3.28051	1.15531
XR_107763.1	2.2997	1.73377	0.64036
AK051808	2.29991	1.45032	2.29444
AK148924	2.30073	0.814747	1.03931
AK048822	2.30233	1.51395	2.59302
AK030451	2.30243	3.34904	0.972553
AK053454	2.30396	3.09892	4.77518
NR_045601.1	2.30491	1.92521	0.814759
AK009060	2.30508	4.16223	3.61259
AK041475	2.30511	2.63138	0.894147
AK078446	2.30626	1.978	1.98985
AK086533	2.30838	1.43396	1.5167
AK009121	2.31004	2.9479	3.17408
AK149153	2.31239	2.2326	2.64686
AK079918	2.31343	2.2212	0.962137
AK047178	2.31354	2.46547	1.28177
AK038965	2.31354	2.15399	4.33488
AK039847	2.31497	1.71622	1.51871
AK018192	2.31832	5.1467	0.336738
NR_001584.3	2.31919	1.96302	0.564799
AK042175	2.32069	1.81423	0.685185
AK054516	2.32072	1.69442	1.36471
AK035063	2.32084	2.02459	1.16656
AK144936	2.32174	3.21304	0.843478
XR_108070.1	2.32214	1.93196	1.46684
AK156284	2.32372	2.18465	3.03581
AK080727	2.32419	2.92367	2.82504
AK005752	2.32463	4.02135	1.41895
AK005956	2.32484	2.59873	1.68471
AK032728	2.32547	5.59751	1.40871
AK033720	2.32606	1.87482	1.86608
AK045689	2.32664	1.5281	5.79221
AK016308	2.3295	2.13921	1.20562
AK135622	2.3306	3.58778	3.33926
AK029569	2.3306	1.80394	0.637818
NR_029878.1	2.33101	2.08711	1.54878
AK162163	2.33147	3.37343	2.98881
AK019879	2.33166	1.70208	1.78751
AK006616	2.33315	2.37069	2.72317
AK089876	2.33333	3.02286	2.2819
AK084487	2.33493	1.68606	1.64788
AK131650	2.33519	2.39638	1.82754
AK048128	2.33596	1.92885	0.348716
AK148811	2.33659	2.12916	2.04892
AK165367	2.33678	0.493785	0.930623
AK051976	2.33721	2.18042	0.558713
AK052683	2.33786	2.07106	0.471253
AK172671	2.33842	0.862949	0.224
AK048762	2.33936	2.72184	2.3185
NR_030443.1	2.34083	1.71605	1.40564
AK143437	2.34109	1.69754	2.01624
AK087377	2.3414	4.80872	5.04843
AK085145	2.34197	3.33671	0.611263
AK053096	2.34198	1.22962	0.423221
AK048582	2.34369	2.26725	1.94406
AK035706	2.34393	1.82104	1.36427
AK034441	2.34425	1.68516	0.446524
AK137098	2.34545	1.30457	0.705756
NR_046044.1	2.34638	3.17242	0.45613
AK089700	2.34829	0.952774	1.10331
XR_002341.3	2.3491	2.04731	1.8075
AK172117	2.34994	3.91352	4.2708
AK035314	2.3507	1.83166	3.09419
AK015383	2.35163	3.12178	0.80789
AK030691	2.35328	1.71186	2.34587
AK017469	2.35664	1.37369	0.536276
AK044918	2.35673	2.4269	2.32749
AK052976	2.35676	2.69841	2.69237
AK051948	2.35791	1.98464	1.13364
AK156599	2.35864	2.08724	1.82229
AK048259	2.35912	3.18737	3.37686
AK144629	2.35918	2.26115	0.54057
AK038185	2.35965	1.00398	0.196637
AK132835	2.35979	1.89771	4.57672
AK079466	2.35979	1.54948	1.88041
AK015085	2.35993	2.04453	1.09647
AK032121	2.36236	2.3577	1.39969
AK156173	2.36404	2.77799	1.80486
AK048748	2.36492	3.50403	1.7379
AK135102	2.36584	1.62661	1.7808
AK048929	2.36863	1.89697	2.65083
AK134531	2.36891	5.63109	1.25889
AK079861	2.36901	1.4715	2.29078
AK038322	2.37011	1.5572	1.55756
AK048049	2.37018	2.19794	0.847044
AK050756	2.3705	2.61691	2.85432
AK165361	2.37076	1.86782	1.10863
AK016381	2.37197	2.63322	3.28893
AK085609	2.37199	2.25769	2.20378
AK048334	2.37318	3.54078	3.10056
AK140304	2.37376	2.47515	2.68588
AK166314	2.37552	2.61892	1.01391
AK041577	2.37591	2.17614	0.283061
AK046701	2.37605	1.67116	2.01349
AK006892	2.3763	2.80873	3.5052
AK050114	2.37785	4.26483	1.54988
AK020498	2.3791	2.67274	2.90894
AK138671	2.38038	2.22375	2.19277
NR_038074.1	2.38264	1.77599	0.950161
AK039822	2.3833	1.55453	0.382244
AK080428	2.38427	6.19064	0.650572
AK157460	2.38526	1.31826	1.94472
AK035558	2.38569	2.56859	2.19881
AK048311	2.38811	1.15649	1.19249
AK088427	2.38881	3.42797	3.44196
AK009022	2.38987	4.81844	2.32512
AK163684	2.3901	2.10809	0.847222
AK037723	2.39117	1.95741	2.24132
AK142696	2.39135	2.72911	4.5944
NR_029470.1	2.39302	2.75116	2.88605
AK043667	2.39331	1.66333	1.39749
AK082413	2.39356	2.53381	0.787835
AK079313	2.39394	2.38324	2.50624
AK142513	2.39431	1.73577	1.8374
AK149131	2.39521	2.22555	4.1976
AK171545	2.39743	1.78135	1.37363
AK038021	2.39928	2.73741	2.51079
AK155274	2.39961	1.61618	0.370992
AK155601	2.40108	3.56388	5.70566
NR_045371.1	2.40164	1.70355	0.585383
AK083099	2.40262	2.33633	1.90507
AK142801	2.40271	3.73096	2.85956
XR_107971.1	2.40333	5.83685	1.90095
AK160352	2.40625	1.46763	0.42327
AK014385	2.40705	2.3229	2.76517
AK089488	2.40753	2.29787	2.94435
AK053459	2.40789	1.28029	0.204867
NR_002870.2	2.41067	3.72511	1.98904
AK160358	2.41147	1.33167	4.06983
AK084926	2.41176	2.51658	0.880749
AK085674	2.41276	2.80863	3.31144
NR_040443.1	2.41302	2.1302	3.36713
AK172127	2.41392	2.81417	3.28776
AK134812	2.41399	1.48771	2.54064
AK084540	2.41447	2.37664	2.25164
AK086963	2.41611	3.05445	1.83223
AK148688	2.4171	1.68653	1.42228
AK050926	2.4171	3.69284	3.89747
AK080499	2.41847	2.84512	1.44676
AK053285	2.4191	2.18966	1.94828
AK019616	2.42135	1.81056	1.59472
AK005401	2.42198	2.34505	4.68791
AK144007	2.42285	2.1984	2.64729
AK087697	2.42385	5.07128	1.90205
NR_038043.1	2.42526	3.37895	2.36
AK036433	2.42628	1.76013	0.0995755
AK085129	2.42631	2.63216	3.06577
AK007219	2.42675	2.20807	2.95541
AK086768	2.42715	8.54359	2.71793
AK155834	2.42746	1.34197	2.90415
XR_141775.1	2.42755	2.06413	4.07601
NR_038059.1	2.42804	2.23614	2.03766
AK039853	2.42917	1.80135	1.06767
AK006577	2.43049	2.46901	2.39196
AK034145	2.43053	2.63601	2.08415
NR_040509.1	2.43162	2.7094	2.70085
AK172535	2.43498	1.43702	1.12545
AK079957	2.43499	2.5325	4.02677
XR_107824.1	2.43667	2.65094	3.13254
AK080803	2.43772	1.54152	0.935986
AK156092	2.43785	1.29685	1.98701
AK165961	2.4384	2.86065	1.73633
AK049012	2.441	1.298	1.883
NR_029788.1	2.44108	2.52052	2.9033
AK157660	2.44294	2.03638	0.960057
AK078979	2.44304	1.61121	1.46474
NR_040460.1	2.44334	1.65739	0.379722
AK083060	2.44379	3.3548	3.75293
XR_108022.2	2.44512	0.733303	0.477348
AK078486	2.44569	3.79213	2.1236
AK052469	2.44624	3.04973	1.34812
AK020601	2.44689	3.37675	2.1483
AK172239	2.44742	3.21443	4.83505
AK043727	2.44862	2.13762	4.46514
AK172589	2.44864	1.11106	0.360843
AK143459	2.4489	2.41138	3.58344
AK139316	2.44898	2.40306	1.89626
AK081658	2.44993	1.753	1.55407
AK078562	2.45	1.35462	0.279231
AK137103	2.45095	2.48709	3.13253
AK029026	2.45188	2.92822	1.79772
AK035045	2.45301	2.34699	1.74337
AK039760	2.45413	2.26112	1.31263
AK052093	2.45487	1.33657	1.39255
NR_045874.1	2.45516	4.02961	2.09475
AK134256	2.45537	2.96402	2.20764
AK031345	2.45576	3.52421	2.21202
AK035650	2.45758	1.30667	1.18237
AK037456	2.45793	2.15656	2.2818
NR_045757.1	2.4584	2.00483	2.4369
AK016652	2.45857	1.5408	1.4611
AK046977	2.46015	2.11128	1.16541
AK014058	2.46074	4.28409	1.95372
AK141095	2.46166	2.17527	2.46166
AK048776	2.46234	1.95763	0.353578
AK164699	2.46292	1.58413	0.318123
AK042043	2.46341	4.63415	6.51441
AK047661	2.46399	1.86767	2.79229
AK036135	2.46558	2.53137	0.591707
AK044220	2.46558	2.39598	3.54718
AK136544	2.46561	1.83567	1.74376
XR_168848.1	2.46621	2.21331	1.25713
NR_030432.1	2.46705	2.93012	3.14735
AK039680	2.46761	2.35964	3.28481
AK050094	2.46808	1.27145	2.17127
AK150855	2.47187	2.20145	2.19238
AK137047	2.47243	2.62409	0.560133
AK085737	2.47303	3.79046	1.19312
AK041345	2.47415	4.99864	1.8966
AK044054	2.47433	1.41621	1.08655
NR_027630.1	2.47722	2.10192	2.81175
AK016106	2.47788	1.33792	1.06949
NR_029556.1	2.47926	1.25806	2.02304
AK079783	2.48029	2.72025	1.87378
AK034791	2.48044	2.5444	0.587209
AK137778	2.48113	1.7017	1.32865
XR_107521.1	2.48253	1.99513	4.63444
NR_045429.1	2.4827	3.59199	2.39344
NR_029736.1	2.4831	3.15661	1.59178
AK156061	2.48389	1.96331	1.294
AK016379	2.48456	0.957741	1.4486
AK081086	2.48998	3.55556	2.86521
AK153665	2.49004	4.35509	1.13827
AK085612	2.49045	3.10828	3.30149
AK133015	2.49278	3.20206	3.37113
AK011275	2.49299	2.63854	0.220573
NR_027658.1	2.49435	2.25254	0.718079
AK031150	2.4966	2.05272	2
AK029299	2.49713	3.43212	1.82983
AK171052	2.49836	2.36425	0.593425
AK036574	2.50414	1.83787	1.8929
AK042724	2.50761	1.84016	0.699475
AK028362	2.51074	4.89008	1.81157
AK006243	2.51502	2.6437	0.376412
AK047132	2.5153	1.86233	3.20937
AK153584	2.51827	2.12292	2.51993
AK040838	2.51996	1.54085	1.11227
AK008458	2.52122	3.85739	4.08571
AK085983	2.52224	2.41176	1.38737
AK054530	2.5225	5.68421	2.20824
AK157401	2.52298	2.60589	1.06129
AK087246	2.52303	3.59733	3.98663
AK157878	2.52361	1.62222	5.61667
NR_015587.2	2.52504	2.38126	2.12924
AK084909	2.52742	1.27316	2.6049
AK157402	2.52822	2.11143	1.55716
XR_104808.2	2.52951	1.36762	2.52782
AK047615	2.53183	2.5462	1.24641
AK020835	2.53206	1.2083	0.453046
AK048271	2.53245	2.89554	0.810345
NR_030449.1	2.53503	2.16348	3.64968
XR_035386.2	2.53549	1.10917	1.46758
NR_027477.1	2.53614	1.7759	2.10482
AK046200	2.53649	2.24655	1.88757
AK018882	2.53967	1.25437	3.92839
AK172082	2.54098	2.48244	3.01054
AK077040	2.54294	2.75546	3.79185
AK136104	2.54376	1.70917	0.467264
AK049144	2.54432	2.59876	0.986003
AK142577	2.54633	3.14576	0.340113
AK045338	2.54796	2.20204	1.08097
AK036958	2.54964	1.30266	3.44068
AK157253	2.55057	2.20926	1.76388
AK038102	2.55102	3.36549	1.58998
AK039129	2.5524	3.53286	1.19982
AK002956	2.55432	1.22423	0.279944
AK134880	2.55517	1.70807	2.17071
AK029390	2.55681	4.31124	0.681305
NR_045446.1	2.55749	3.54355	3.91812
NR_040594.1	2.55781	2.45411	2.21692
AK051113	2.55863	1.1753	0.619087
AK163159	2.56	1.23577	1.96769
AK039616	2.56024	3.8244	1.94109
AK045196	2.56044	2.18076	1.38458
NR_030450.1	2.56122	1.46053	2.79117
XR_168599.1	2.5623	1.80511	4.78914
AK142485	2.5646	0.868324	1.02545
NR_003559.1	2.56581	1.93987	5.11817
AK029204	2.57031	0.99783	1.98394
AK039529	2.5709	5.02526	4.78343
AK053985	2.57313	3.02801	1.67583
NR_028525.1	2.57328	1.02968	1.15955
NR_035516.1	2.57328	6.58071	7.29685
AK040276	2.57398	2.27094	2.27094
NR_045500.1	2.57478	3.56186	0.717539
AK034606	2.57618	2.81961	2.54116
NR_045783.1	2.5762	2.66806	1.64927
AK015406	2.57622	3.72963	1.2488
AK048734	2.57724	3.52439	2.55285
AK138323	2.57885	3.40779	5.42987
AK149831	2.57938	4.54639	3.85361
AK156362	2.58025	2.20875	2.46016
AK020206	2.5812	2.02875	0.845048
XR_141631.1	2.58386	4.50106	3.6327
AK020156	2.58761	3.66934	2.7896
AK139295	2.58978	2.77901	2.83011
NR_027618.1	2.59046	2.29568	3.92664
AK157097	2.59233	3.15968	4.02052
AK017177	2.59281	2.49601	1.8483
AK141313	2.59302	1.75581	1.23837
NR_045761.1	2.59401	3.58856	2.80654
AK032803	2.59411	3.0982	1.90016
AK049483	2.59451	3.56866	1.5412
AK081161	2.5985	3.04211	1.56259
AK038850	2.59961	2.33333	3.01578
AK079576	2.60533	2.37288	2.67797
AK033312	2.60636	2.26441	3.34592
AK142151	2.6075	2.23669	2.95069
AK027961	2.60838	2.99271	2.16211
AK157003	2.60847	2.65079	2.26102
AK051446	2.60929	3.48537	2.52151
AK162417	2.6112	2.7104	2.6224
AK046391	2.6117	2.91755	5.26064
AK134159	2.6122	3.25984	1.86811
AK134502	2.61275	2.91248	0.846814
AK138594	2.61429	5.18571	3.15102
AK041445	2.61818	3.02	1.82364
AK140097	2.6186	1.70682	0.78843
AK164348	2.62141	3.86424	4.52581
AK051954	2.62169	2.19393	0.600222
AK087031	2.62314	0.913243	2.80345
AK143879	2.62458	3.45922	1.85363
AK156221	2.62478	1.65841	1.95752
AK076995	2.62661	1.33464	0.569343
AK040369	2.62689	2.64205	2.86553
AK007695	2.63102	2.77819	1.34252
AK084795	2.63298	2.02926	4.15957
AK032665	2.63372	2.73062	3.23062
AK003136	2.63715	2.44684	0.828977
AK079569	2.63751	2.80583	0.813531
AK041438	2.63807	1.17963	1.16189
XR_142238.1	2.63883	2.05846	2.08351
NR_045741.1	2.63898	2.23323	2.99361
AK049580	2.63958	0.894386	0.812328
AK082021	2.64304	2.0533	1.27303
NR_038173.1	2.64455	1.12837	1.82879
AK008898	2.64499	1.70299	1.54833
AK017123	2.6452	1.87789	0.786452
XR_142038.2	2.64737	2.24933	1.66769
AK089723	2.64763	1.83672	2.28405
AK136753	2.64821	4.25268	2.92679
AK018211	2.64826	2.63565	1.70189
AK048117	2.64935	1.8263	3.52922
AK041576	2.65096	4.97131	1.3224
AK090249	2.65116	2.59417	1.85186
AK015544	2.65138	3.2737	2.63456
AK150054	2.65584	1.98864	1.73864
AK139105	2.65605	3.6189	2.97877
AK045320	2.65716	2.355	2.4751
AK044689	2.65728	1.85759	3
AK046287	2.65835	2.85221	5.07486
NR_037228.1	2.65854	5.23077	4.58161
AK005856	2.66184	1.38133	2.804
AK086709	2.66339	4.67309	0.917043
AK015518	2.66472	1.60234	2.83626
AK048236	2.6658	1.55973	0.436676
AK030939	2.66749	2.19422	1.93362
AK076959	2.66765	2.22602	0.997248
AK019306	2.66823	2.23396	1.45227
AK148265	2.66905	2.76429	1.29762
AK134839	2.67082	2.82377	1.95927
NR_034074.1	2.67195	1.48369	1.51771
AK156964	2.67399	4.17216	2.15385
AK149006	2.67422	2.86934	2.39547
AK011142	2.67432	3.82255	3.85804
AK037280	2.67541	1.76751	1.49984
AK162193	2.6758	1.95129	0.69102
AK032144	2.67864	2.8034	2.24008
AK079656	2.67963	1.72006	1.60964
AK051940	2.68238	1.60492	2.34734
AK172670	2.68405	3.59714	1.01125
AK139993	2.6867	4.69035	2.91257
AK006564	2.68707	1.49769	1.25635
NR_030552.1	2.68793	1.65666	1.72295
AK137350	2.68864	1.6843	0.465742
AK034548	2.68893	11.6362	1.08787
AK083708	2.68938	2.04606	1.28854
AK034378	2.69127	1.14608	2.21611
AK144263	2.69479	6.45592	1.13744
NR_028524.1	2.69539	2.09955	1.76969
AK048002	2.69693	2.0621	3.58049
NR_040505.1	2.69752	1.87438	1.58182
AK042397	2.69769	2.24898	0.64898
AK081120	2.7007	2.7035	1.97622
AK049416	2.7037	4.88694	4.57115
AK009975	2.70382	3.14013	3.41083
NR_027907.1	2.70404	2.82814	2.31009
AK045381	2.70433	2.8222	6.34188
AK161145	2.70478	2.27027	2.64241
AK049221	2.70493	1.68301	1.31121
AK039574	2.70588	3.49673	3.89107
AK034172	2.70799	2.27569	1.54812
AK004581	2.70928	3.36495	3.36495
AK019580	2.71203	5.26627	1.04142
AK021155	2.71449	1.65949	1.08704
AK144774	2.71508	1.75317	2.26905
AK079535	2.72062	1.80398	0.966352
XR_104809.1	2.72281	2.1114	0.795143
NR_039568.1	2.72472	1.4073	1.65356
AK139017	2.726	2.396	2.31133
AK019595	2.7276	2.58961	3.91398
AK036269	2.72915	2.36044	1.3122
XR_168910.1	2.72952	2.62751	2.34467
AK032720	2.73081	4.17769	3.0732
AK137182	2.73318	2.68043	1.77523
AK042352	2.73724	4.13043	3.87335
AK135815	2.74286	5.1981	4.35429
AK051819	2.74322	4.24635	3.26514
NR_045997.1	2.7451	2.7756	1.47059
AK135362	2.74556	3.61144	3.29586
AK005087	2.74719	3.83221	2.1161
AK155820	2.74953	4.18823	2.08426
AK004382	2.75068	1.44023	1.26072
XR_105205.1	2.75152	1.82961	2.82759
AK008342	2.75389	1.70493	1.97929
AK145056	2.7543	3.2973	3.99754
AK137915	2.75433	2.41683	1.18558
AK043349	2.75446	1.4636	1.92898
NR_030555.1	2.76182	0.894545	0.734545
AK016173	2.76314	1.64291	2.63931
AK153590	2.76459	2.42182	1.37806
NR_045179.1	2.76549	2.0067	2.69095
AK157658	2.76651	2.26887	1.82783
AK139811	2.76966	5.16854	2.75843
AK018871	2.77201	3.01689	2.28151
AK162130	2.77519	3.78295	2.8469
AK053313	2.77805	4.34349	0.972859
AK003017	2.77909	2.0489	2.35413
AK159036	2.77972	4.27189	3.93134
AK154159	2.78013	1.70433	0.332036
AK033766	2.78214	2.20952	0.940476
AK019564	2.78215	1.17562	1.8841
AK153616	2.78236	1.84973	2.46195
AK048887	2.78462	4.23248	2.68889
AK085096	2.78559	3.55185	3.27592
NR_073462.1	2.78662	3.1465	2.36306
AK145347	2.7868	6.46069	0.398253
AK162836	2.78692	1.67809	0.254734
AK079047	2.78739	1.04958	1.41277
NR_040285.1	2.79368	3.57895	3.65263
AK035628	2.79602	2.17513	0.127592
AK084769	2.80026	2.79008	0.794778
NR_039560.1	2.80211	1.49684	3.81895
AK158812	2.80296	1.66995	0.377668
AK081568	2.80296	1.88796	1.57859
NR_037291.1	2.8034	1.39698	2.54631
AK137335	2.80407	1.06562	1.68829
AK019416	2.80418	2.93547	0.969189
AK031329	2.80504	2.2782	2.21906
XR_035326.2	2.80601	3.3347	1.32535
AK046144	2.80903	2.32118	2.14323
AK145036	2.81109	2.11457	0.195376
AK079705	2.81157	1.89587	2.25124
AK160707	2.81243	2.03223	0.858584
AK018047	2.81416	11.2751	3.44617
AK171407	2.81633	2.4983	2.39626
AK138310	2.81633	4.52211	3.56122
AK048073	2.81986	3.26443	2.9746
AK048189	2.82229	2.07108	2.26656
AK162059	2.82289	2.04279	1.56517
AK087645	2.82302	3.35953	0.826114
AK043459	2.82535	5.20556	5.56414
XR_141738.1	2.82793	1.38404	3.12718
AK158484	2.838	3.03087	2.6795
AK155211	2.83897	2.94036	4.87276
AK020281	2.84076	2.0552	2.38004
AK046824	2.84424	1.80361	0.875847
AK050254	2.84508	2.76774	2.90019
AK170736	2.84766	0.760045	0.459542
AK131682	2.85043	3.26068	2.72222
AK040557	2.85065	0.676948	0.989177
AK157516	2.85145	1.61056	0.697344
AK019092	2.8527	1.86306	1.37972
AK003924	2.85321	1.28854	1.1023
AK019281	2.85361	2.84536	2.73711
AK040649	2.85444	3.83552	1.62882
AK161031	2.85473	5.86468	2.04776
AK085878	2.8568	2.28943	3.46166
AK040125	2.858	2.88449	4.04137
XR_105333.1	2.85897	4.57479	10.0577
AK017164	2.86151	2.81295	2.17086
AK034831	2.86444	1.80216	2.9199
AK139126	2.8659	3.52753	1.86767
NR_045803.1	2.86621	4.75129	2.31732
AK003304	2.86851	2.35176	1.933
AK153842	2.8707	2.22422	2.27332
NR_040465.1	2.87432	3.42077	4.06375
AK030266	2.8796	3.45766	1.67438
AK033879	2.88018	3.07327	2.27189
AK133160	2.88272	4.00137	1.24005
AK050174	2.88406	1.5942	1.90119
AK020644	2.88445	2.01404	0.979482
AK038311	2.88577	3.37675	2.90782
NR_035526.1	2.88762	1.12571	1.51429
AK140262	2.88855	2.09096	3.41687
AK133550	2.89864	1.8655	3.94932
AK162976	2.89978	2.56645	1.55773
AK044039	2.90092	3.15413	4.59266
[truncated: 512 more rows]
